# Supplementary material for: Fungal-Algal Association Drives Lichen Mutualistic Symbiosis: A Case Study With Trebouxia-Related Lichens
Source: Preprints.org preprint supplement (doi:10.20944/preprints202305.1720.v1), 2023-05-25
Supplement: Supplementary file 1 [file supplementary]

Archive with 11 entries (11 files):
- Supplementary Materials/Figure S1.pdf
- Supplementary Materials/Figure S2.pdf
- Supplementary Materials/Figure S3.pdf
- Supplementary Materials/Figure S4.pdf
- Supplementary Materials/Figure S5.pdf
- Supplementary Materials/Figure S6.pdf
- Supplementary Materials/Figure S7.pdf
- Supplementary Materials/Table S1.xlsx
- Supplementary Materials/Table S2.docx
- Supplementary Materials/Table S3.xlsx
- Supplementary Materials/Table S4.xlsx
