# Supplementary material for: Fungal-Algal Association Drives Lichen Mutualistic Symbiosis: A Case Study With Trebouxia-Related Lichens
Source: Preprints.org preprint supplement (doi:10.20944/preprints202305.1720.v1), 2023-05-25
Supplement: Supplementary file 1 [file supplementary]

## Sheet: sheet 1
Table S4. The information on geographical distance, bioclimatic variables, and other factors of lichen-forming fungi and algae.
Species name		Specimens No.	Coll. No.	Reproduction mode		Distribution																specificity of mycobionts towards photobionts				specificity of Photobionts towards mycobionts							geographical distance		19 bioclimatic variables
																																			annual mean temperature	annual mean diurnal range (mean of the monthly temperature ranges (monthly maximum minus monthly minimum))	isothermality (variation in day-to-night temperatures relative to the variation in annual summer-to-winter temperatures)	temperature seasonality (variation in temperature over a given year (or averaged years) based on the standard deviation (variation) of monthly temperature averages)	maximum temperature of warmest month	minimum temperature of coldest month	annual temperature range (annual variation in temperature)	mean temperature of wettest quarter	mean temperature of driest quarter	mean temperature of warmest quarter	mean temperature of coldest quarter	annual precipitation (sum of all total monthly precipitation values)	precipitation of wettest month (total precipitation of the wettest month)	precipitation of driest month (total precipitation during the wettest month)	precipitation seasonality (ratio of the standard deviation of the monthly total precipitation to the mean monthly total precipitation)
Mycobiont	Photobiont			Sexual Reproduction	Vegetative (asexual) Reproduction	pan-tropical distribution	global distribution	pan-temperate distribution	bipolar distribution	tropical to temperate	Tropical Asia distribution	Eurasian-North American discontinuous distribution	Eurasian-American discontinuous distribution	Endemic to East Asia	Endemic to China	Magellanic-Antarctic endemic	Endemic to Soutnern Hemisphere	Antarctic endemic	Europe-America-Antarctic disjunct distribution	Eurasian discontinuous distribution	the Mediterranean to temperate zone, Asia, America and Oceania disjunct distribution	1	2	3	4	1	2	3	4	5	6-10	>10	Longitude	Latitude	bio1	bio2	bio3	bio4	bio5	bio6	bio7	bio8	bio9	bio10	bio11	bio12	bio13	bio14	bio15
Diplotomma alboatrum	Trebouxia arboricola	1-6-1	1-6-1	1	0	0	1	0	0	0	0	0	0	0	0	0	0	0	0	0	0	0	0	0	1	0	0	0	1	0	0	0	34.7764	30.8736	18.7417	11.85	45.4023	545.926	32.1	6	26.1	11.65	24.9167	24.9167	11.65	161	34	0	109.932
Diplotomma alboatrum	Trebouxia arboricola	1-6-2	1-6-2	1	0	0	1	0	0	0	0	0	0	0	0	0	0	0	0	0	0	0	0	0	1	0	0	0	1	0	0	0	34.7764	30.8736	18.7417	11.85	45.4023	545.926	32.1	6	26.1	11.65	24.9167	24.9167	11.65	161	34	0	109.932
Diplotomma alboatrum	Trebouxia sp.1	1-6-4	1-6-4	1	0	0	1	0	0	0	0	0	0	0	0	0	0	0	0	0	0	0	0	0	1	1	0	0	0	0	0	0	34.7764	30.8736	18.7417	11.85	45.4023	545.926	32.1	6	26.1	11.65	24.9167	24.9167	11.65	161	34	0	109.932
Diplotomma alboatrum	Trebouxia arboricola	1-6-5	1-6-5	1	0	0	1	0	0	0	0	0	0	0	0	0	0	0	0	0	0	0	0	0	1	0	0	0	1	0	0	0	34.7764	30.8736	18.7417	11.85	45.4023	545.926	32.1	6	26.1	11.65	24.9167	24.9167	11.65	161	34	0	109.932
Diplotomma alboatrum	Trebouxia arboricola	1-6-6	1-6-6	1	0	0	1	0	0	0	0	0	0	0	0	0	0	0	0	0	0	0	0	0	1	0	0	0	1	0	0	0	34.7764	30.8736	18.7417	11.85	45.4023	545.926	32.1	6	26.1	11.65	24.9167	24.9167	11.65	161	34	0	109.932
Hypogymnia hypotrypa	Trebouxia sp.5	12100615	12100615	1	1	0	0	0	0	0	0	0	0	1	0	0	0	0	0	0	0	1	0	0	0	1	0	0	0	0	0	0	138.187	35.8611	4.50833	9.18333	27.4129	887.068	21.2	-12.3	33.5	15.3333	-6.31667	15.3333	-6.31667	1994	272	56	53.0147
Diplotomma alboatrum	Trebouxia sp.1	2-6-1	2-6-1	1	0	0	1	0	0	0	0	0	0	0	0	0	0	0	0	0	0	0	0	0	1	1	0	0	0	0	0	0	34.7764	30.8737	18.7417	11.85	45.4023	545.926	32.1	6	26.1	11.65	24.9167	24.9167	11.65	161	34	0	109.932
Diplotomma alboatrum	Trebouxia arboricola	2-6-2	2-6-2	1	0	0	1	0	0	0	0	0	0	0	0	0	0	0	0	0	0	0	0	0	1	0	0	0	1	0	0	0	34.7764	30.8737	18.7417	11.85	45.4023	545.926	32.1	6	26.1	11.65	24.9167	24.9167	11.65	161	34	0	109.932
Diplotomma alboatrum	Trebouxia arboricola	2-6-3	2-6-3	1	0	0	1	0	0	0	0	0	0	0	0	0	0	0	0	0	0	0	0	0	1	0	0	0	1	0	0	0	34.7764	30.8737	18.7417	11.85	45.4023	545.926	32.1	6	26.1	11.65	24.9167	24.9167	11.65	161	34	0	109.932
Diplotomma alboatrum	Trebouxia arboricola	2-6-4	2-6-4	1	0	0	1	0	0	0	0	0	0	0	0	0	0	0	0	0	0	0	0	0	1	0	0	0	1	0	0	0	34.7764	30.8737	18.7417	11.85	45.4023	545.926	32.1	6	26.1	11.65	24.9167	24.9167	11.65	161	34	0	109.932
Diplotomma alboatrum	Trebouxia sp.2	2-6-5	2-6-5	1	0	0	1	0	0	0	0	0	0	0	0	0	0	0	0	0	0	0	0	0	1	1	0	0	0	0	0	0	34.7764	30.8737	18.7417	11.85	45.4023	545.926	32.1	6	26.1	11.65	24.9167	24.9167	11.65	161	34	0	109.932
Diplotomma alboatrum	Trebouxia arboricola	2-6-6	2-6-6	1	0	0	1	0	0	0	0	0	0	0	0	0	0	0	0	0	0	0	0	0	1	0	0	0	1	0	0	0	34.7764	30.8737	18.7417	11.85	45.4023	545.926	32.1	6	26.1	11.65	24.9167	24.9167	11.65	161	34	0	109.932
Diplotomma alboatrum	Trebouxia sp.1	3-6-1	3-6-1	1	0	0	1	0	0	0	0	0	0	0	0	0	0	0	0	0	0	0	0	0	1	1	0	0	0	0	0	0	34.7762	30.8738	18.7417	11.85	45.4023	545.926	32.1	6	26.1	11.65	24.9167	24.9167	11.65	161	34	0	109.932
Diplotomma alboatrum	Trebouxia arboricola	3-6-2	3-6-2	1	0	0	1	0	0	0	0	0	0	0	0	0	0	0	0	0	0	0	0	0	1	0	0	0	1	0	0	0	34.7762	30.8738	18.7417	11.85	45.4023	545.926	32.1	6	26.1	11.65	24.9167	24.9167	11.65	161	34	0	109.932
Diplotomma alboatrum	Trebouxia arboricola	3-6-3	3-6-3	1	0	0	1	0	0	0	0	0	0	0	0	0	0	0	0	0	0	0	0	0	1	0	0	0	1	0	0	0	34.7762	30.8738	18.7417	11.85	45.4023	545.926	32.1	6	26.1	11.65	24.9167	24.9167	11.65	161	34	0	109.932
Diplotomma alboatrum	Trebouxia arboricola	4-6-1	4-6-1	1	0	0	1	0	0	0	0	0	0	0	0	0	0	0	0	0	0	0	0	0	1	0	0	0	1	0	0	0	34.7766	30.8742	18.7417	11.85	45.4023	545.926	32.1	6	26.1	11.65	24.9167	24.9167	11.65	161	34	0	109.932
Diplotomma alboatrum	Trebouxia arboricola	4-6-2	4-6-2	1	0	0	1	0	0	0	0	0	0	0	0	0	0	0	0	0	0	0	0	0	1	0	0	0	1	0	0	0	34.7766	30.8742	18.7417	11.85	45.4023	545.926	32.1	6	26.1	11.65	24.9167	24.9167	11.65	161	34	0	109.932
Diplotomma alboatrum	Trebouxia sp.1	4-6-3	4-6-3	1	0	0	1	0	0	0	0	0	0	0	0	0	0	0	0	0	0	0	0	0	1	1	0	0	0	0	0	0	34.7766	30.8742	18.7417	11.85	45.4023	545.926	32.1	6	26.1	11.65	24.9167	24.9167	11.65	161	34	0	109.932
Diplotomma alboatrum	Trebouxia arboricola	4-6-4	4-6-4	1	0	0	1	0	0	0	0	0	0	0	0	0	0	0	0	0	0	0	0	0	1	0	0	0	1	0	0	0	34.7766	30.8742	18.7417	11.85	45.4023	545.926	32.1	6	26.1	11.65	24.9167	24.9167	11.65	161	34	0	109.932
Diplotomma alboatrum	Trebouxia arboricola	4-6-5	4-6-5	1	0	0	1	0	0	0	0	0	0	0	0	0	0	0	0	0	0	0	0	0	1	0	0	0	1	0	0	0	34.7766	30.8742	18.7417	11.85	45.4023	545.926	32.1	6	26.1	11.65	24.9167	24.9167	11.65	161	34	0	109.932
Diplotomma alboatrum	Trebouxia arboricola	4-6-6	4-6-6	1	0	0	1	0	0	0	0	0	0	0	0	0	0	0	0	0	0	0	0	0	1	0	0	0	1	0	0	0	34.7766	30.8742	18.7417	11.85	45.4023	545.926	32.1	6	26.1	11.65	24.9167	24.9167	11.65	161	34	0	109.932
Diplotomma alboatrum	Trebouxia arboricola	8-6-1	8-6-1	1	0	0	1	0	0	0	0	0	0	0	0	0	0	0	0	0	0	0	0	0	1	0	0	0	1	0	0	0	34.777	30.8751	18.6833	11.85	45.7529	542.709	31.9	6	25.9	11.6167	24.8	24.8	11.6167	168	36	0	109.35
Diplotomma alboatrum	Trebouxia arboricola	9-6-1	9-6-1	1	0	0	1	0	0	0	0	0	0	0	0	0	0	0	0	0	0	0	0	0	1	0	0	0	1	0	0	0	34.7769	30.8753	18.6833	11.85	45.7529	542.709	31.9	6	25.9	11.6167	24.8	24.8	11.6167	168	36	0	109.35
Diplotomma alboatrum	Trebouxia arboricola	9-6-2	9-6-2	1	0	0	1	0	0	0	0	0	0	0	0	0	0	0	0	0	0	0	0	0	1	0	0	0	1	0	0	0	34.7769	30.8753	18.6833	11.85	45.7529	542.709	31.9	6	25.9	11.6167	24.8	24.8	11.6167	168	36	0	109.35
Diplotomma alboatrum	Trebouxia sp.2	9-6-3	9-6-3	1	0	0	1	0	0	0	0	0	0	0	0	0	0	0	0	0	0	0	0	0	1	1	0	0	0	0	0	0	34.7769	30.8753	18.6833	11.85	45.7529	542.709	31.9	6	25.9	11.6167	24.8	24.8	11.6167	168	36	0	109.35
Hypogymnia hypotrypa	Trebouxia sp.5	9091210	9091210	1	1	0	0	0	0	0	0	0	0	1	0	0	0	0	0	0	0	1	0	0	0	1	0	0	0	0	0	0	138.174	35.8828	5.5	9.56667	28.1373	891.674	22.4	-11.6	34	16.0333	-5.38333	16.35	-5.38333	1858	253	52	53.0495
Circinaria sp3.	Trebouxia cretacea	ALS1-3	ALS2018052	1	0	0	0	0	0	0	0	0	0	0	1	0	0	0	0	0	0	1	0	0	0	0	0	0	0	0	0	1	101.109	39.5419	6.9	14.9	32.1	1150.1	28.9	-17.5	46.4	20.4	-8.1	20.4	-8.1	113	28	0	105.8
Acarospora strigata	Trebouxia cretacea	ALS1-6	ALS2018055	1	0	0	0	0	0	1	0	0	0	0	0	0	0	0	0	0	0	1	0	0	0	0	0	0	0	0	0	1	101.109	39.5419	6.9	14.9	32.1	1150.1	28.9	-17.5	46.4	20.4	-8.1	20.4	-8.1	113	28	0	105.8
Circinaria tortuosa	Trebouxia cretacea	ALS1-7	ALS2018056	1	0	0	0	0	0	0	0	0	0	0	1	0	0	0	0	0	0	0	1	0	0	0	0	0	0	0	0	1	101.109	39.5419	6.9	14.9	32.1	1150.1	28.9	-17.5	46.4	20.4	-8.1	20.4	-8.1	113	28	0	105.8
Acarospora strigata	Trebouxia cretacea	ALS1-8	ALS2018057	1	0	0	0	0	0	1	0	0	0	0	0	0	0	0	0	0	0	1	0	0	0	0	0	0	0	0	0	1	101.109	39.5419	6.9	14.9	32.1	1150.1	28.9	-17.5	46.4	20.4	-8.1	20.4	-8.1	113	28	0	105.8
Circinaria tortuosa	Trebouxia sp.3	ALS2-4	ALS2018061	1	0	0	0	0	0	0	0	0	0	0	1	0	0	0	0	0	0	0	1	0	0	0	1	0	0	0	0	0	101.109	39.5419	6.9	14.9	32.1	1150.1	28.9	-17.5	46.4	20.4	-8.1	20.4	-8.1	113	28	0	105.8
Circinaria sp2.	Trebouxia cretacea	ALS2-6	ALS2018063	1	0	0	0	0	0	0	0	0	0	0	1	0	0	0	0	0	0	1	0	0	0	0	0	0	0	0	0	1	101.109	39.5419	6.9	14.9	32.1	1150.1	28.9	-17.5	46.4	20.4	-8.1	20.4	-8.1	113	28	0	105.8
Circinaria tortuosa	Trebouxia sp.3	ALS3-1	ALS2018069	1	0	0	0	0	0	0	0	0	0	0	1	0	0	0	0	0	0	0	1	0	0	0	1	0	0	0	0	0	101.109	39.5419	6.9	14.9	32.1	1150.1	28.9	-17.5	46.4	20.4	-8.1	20.4	-8.1	113	28	0	105.8
Circinaria tortuosa	Trebouxia cretacea	ALS3-2	ALS2018070	1	0	0	0	0	0	0	0	0	0	0	1	0	0	0	0	0	0	0	1	0	0	0	0	0	0	0	0	1	101.109	39.5419	6.9	14.9	32.1	1150.1	28.9	-17.5	46.4	20.4	-8.1	20.4	-8.1	113	28	0	105.8
Candelariella sp.	Trebouxia cretacea	ALS3-4	ALS2018072	1	0	0	0	0	0	0	0	0	0	0	1	0	0	0	0	0	0	1	0	0	0	0	0	0	0	0	0	1	101.109	39.5419	6.9	14.9	32.1	1150.1	28.9	-17.5	46.4	20.4	-8.1	20.4	-8.1	113	28	0	105.8
Circinaria tortuosa	Trebouxia sp.3	ALS3-6	ALS2018074	1	0	0	0	0	0	0	0	0	0	0	1	0	0	0	0	0	0	0	1	0	0	0	1	0	0	0	0	0	101.109	39.5419	6.9	14.9	32.1	1150.1	28.9	-17.5	46.4	20.4	-8.1	20.4	-8.1	113	28	0	105.8
Lobothallia semisterilis	Trebouxia cretacea	ALS3-7	ALS2018075	1	0	0	0	0	0	0	0	0	0	0	1	0	0	0	0	0	0	0	1	0	0	0	0	0	0	0	0	1	101.109	39.5419	6.9	14.9	32.1	1150.1	28.9	-17.5	46.4	20.4	-8.1	20.4	-8.1	113	28	0	105.8
Lobothallia semisterilis	Trebouxia sp.3	ALS4-1	ALS2018076	1	0	0	0	0	0	0	0	0	0	0	1	0	0	0	0	0	0	0	1	0	0	0	1	0	0	0	0	0	101.109	39.5419	6.9	14.9	32.1	1150.1	28.9	-17.5	46.4	20.4	-8.1	20.4	-8.1	113	28	0	105.8
Lobothallia semisterilis	Trebouxia sp.3	ALS4-4	ALS2018079	1	0	0	0	0	0	0	0	0	0	0	1	0	0	0	0	0	0	0	1	0	0	0	1	0	0	0	0	0	101.109	39.5419	6.9	14.9	32.1	1150.1	28.9	-17.5	46.4	20.4	-8.1	20.4	-8.1	113	28	0	105.8
Caloplaca sp.	Trebouxia cretacea	ALS5-1	ALS2018086	1	0	0	0	0	0	0	0	0	0	0	0	0	0	0	0	1	0	1	0	0	0	0	0	0	0	0	0	1	101.109	39.5419	6.9	14.9	32.1	1150.1	28.9	-17.5	46.4	20.4	-8.1	20.4	-8.1	113	28	0	105.8
Acarospora nodulosa	Trebouxia cretacea	ALS5-12	ALS2018097	1	0	0	1	0	0	0	0	0	0	0	0	0	0	0	0	0	0	1	0	0	0	0	0	0	0	0	0	1	101.109	39.5419	6.9	14.9	32.1	1150.1	28.9	-17.5	46.4	20.4	-8.1	20.4	-8.1	113	28	0	105.8
Lobothallia semisterilis	Trebouxia sp.3	ALS5-13	ALS2018098	1	0	0	0	0	0	0	0	0	0	0	1	0	0	0	0	0	0	0	1	0	0	0	1	0	0	0	0	0	101.109	39.5419	6.9	14.9	32.1	1150.1	28.9	-17.5	46.4	20.4	-8.1	20.4	-8.1	113	28	0	105.8
Caloplaca sp.	Trebouxia cretacea	ALS5-2	ALS2018087	1	0	0	0	0	0	0	0	0	0	0	0	0	0	0	0	1	0	1	0	0	0	0	0	0	0	0	0	1	101.109	39.5419	6.9	14.9	32.1	1150.1	28.9	-17.5	46.4	20.4	-8.1	20.4	-8.1	113	28	0	105.8
Lobothallia semisterilis	Trebouxia sp.3	ALS5-21	ALS2018106	1	0	0	0	0	0	0	0	0	0	0	1	0	0	0	0	0	0	0	1	0	0	0	1	0	0	0	0	0	101.109	39.5419	6.9	14.9	32.1	1150.1	28.9	-17.5	46.4	20.4	-8.1	20.4	-8.1	113	28	0	105.8
Acarospora nodulosa	Trebouxia cretacea	ALS5-4	ALS2018089	1	0	0	1	0	0	0	0	0	0	0	0	0	0	0	0	0	0	1	0	0	0	0	0	0	0	0	0	1	101.109	39.5419	6.9	14.9	32.1	1150.1	28.9	-17.5	46.4	20.4	-8.1	20.4	-8.1	113	28	0	105.8
Lobothallia semisterilis	Trebouxia sp.3	ALS5-5	ALS2018090	1	0	0	0	0	0	0	0	0	0	0	1	0	0	0	0	0	0	0	1	0	0	0	1	0	0	0	0	0	101.109	39.5419	6.9	14.9	32.1	1150.1	28.9	-17.5	46.4	20.4	-8.1	20.4	-8.1	113	28	0	105.8
Lobothallia semisterilis	Trebouxia sp.3	ALS5-7	ALS2018092	1	0	0	0	0	0	0	0	0	0	0	1	0	0	0	0	0	0	0	1	0	0	0	1	0	0	0	0	0	101.109	39.5419	6.9	14.9	32.1	1150.1	28.9	-17.5	46.4	20.4	-8.1	20.4	-8.1	113	28	0	105.8
Hypogymnia hypotrypa	Trebouxia sp.5	ML12014	ML12014	1	1	0	0	0	0	0	0	0	0	1	0	0	0	0	0	0	0	1	0	0	0	1	0	0	0	0	0	0	98.6537	23.64	19.1542	12.375	50.7172	404.994	28.6	4.2	24.4	23.0667	14.6	23.0667	13.55	1488	328	10	92.748
Psoroma fruticulosum	Trebouxia sp.6	NJ2018027	NJ2018027	1	1	0	0	0	0	0	0	0	0	0	0	0	1	0	0	0	0	1	0	0	0	1	0	0	0	0	0	0	-58.9569	-62.2188	5.06667	7.98333	51.5054	298.316	13.3	-2.2	15.5	7.1	5.01667	8.66667	1.3	481	50	29	18.0674
Ochrolechia tartarea	Trebouxia impressa	NJ2018029	NJ2018029	1	0	0	0	0	1	0	0	0	0	0	0	0	0	0	0	0	0	1	0	0	0	0	0	0	0	0	1	0	-58.9569	-62.2188	5.06667	7.98333	51.5054	298.316	13.3	-2.2	15.5	7.1	5.01667	8.66667	1.3	481	50	29	18.0674
Hypogymnia antarctica	Trebouxia jamesii	NJ2018030	NJ2018030	1	0	0	0	0	0	0	0	0	0	0	0	1	0	0	0	0	0	1	0	0	0	0	0	0	0	0	1	0	-58.9569	-62.2188	5.06667	7.98333	51.5054	298.316	13.3	-2.2	15.5	7.1	5.01667	8.66667	1.3	481	50	29	18.0674
Umbilicaria antarctica	Trebouxia jamesii	NJ2018031	NJ2018031	0	0	0	0	0	0	0	0	0	0	0	0	1	0	0	0	0	0	1	0	0	0	0	0	0	0	0	1	0	-58.9569	-62.2188	5.06667	7.98333	51.5054	298.316	13.3	-2.2	15.5	7.1	5.01667	8.66667	1.3	481	50	29	18.0674
Physcia caesia	Trebouxia impressa	NJ2018032	NJ2018032	1	1	0	1	0	0	0	0	0	0	0	0	0	0	0	0	0	0	1	0	0	0	0	0	0	0	0	1	0	-58.9569	-62.2188	5.06667	7.98333	51.5054	298.316	13.3	-2.2	15.5	7.1	5.01667	8.66667	1.3	481	50	29	18.0674
Physcia dubia	Trebouxia impressa	NJ2018033	NJ2018033	1	1	0	1	0	0	0	0	0	0	0	0	0	0	0	0	0	0	1	0	0	0	0	0	0	0	0	1	0	-58.9569	-62.2188	5.06667	7.98333	51.5054	298.316	13.3	-2.2	15.5	7.1	5.01667	8.66667	1.3	481	50	29	18.0674
Gondwania regalis	Trebouxia arboricola	NJ2018034	NJ2018034	1	0	0	0	0	0	0	0	0	0	0	0	1	0	0	0	0	0	0	1	0	0	0	0	0	1	0	0	0	-58.9569	-62.2188	5.06667	7.98333	51.5054	298.316	13.3	-2.2	15.5	7.1	5.01667	8.66667	1.3	481	50	29	18.0674
Gondwania regalis	Trebouxia arboricola	NJ2018035	NJ2018035	1	0	0	0	0	0	0	0	0	0	0	0	1	0	0	0	0	0	0	1	0	0	0	0	0	1	0	0	0	-58.9569	-62.2188	5.06667	7.98333	51.5054	298.316	13.3	-2.2	15.5	7.1	5.01667	8.66667	1.3	481	50	29	18.0674
Tephromela atra	Trebouxia jamesii	NJ2018036	NJ2018036	1	0	0	1	0	0	0	0	0	0	0	0	0	0	0	0	0	0	1	0	0	0	0	0	0	0	0	1	0	-58.9569	-62.2188	5.06667	7.98333	51.5054	298.316	13.3	-2.2	15.5	7.1	5.01667	8.66667	1.3	481	50	29	18.0674
Himantormia lugubris	Trebouxia jamesii	NJ2018037	NJ2018037	1	0	0	0	0	0	0	0	0	0	0	0	0	0	1	0	0	0	1	0	0	0	0	0	0	0	0	1	0	-58.9569	-62.2188	5.06667	7.98333	51.5054	298.316	13.3	-2.2	15.5	7.1	5.01667	8.66667	1.3	481	50	29	18.0674
Ramalina terebrata	Trebouxia arboricola	NJ2018038	NJ2018038	0	1	0	0	0	1	0	0	0	0	0	0	0	0	0	0	0	0	1	0	0	0	0	0	0	1	0	0	0	-58.9569	-62.2188	5.06667	7.98333	51.5054	298.316	13.3	-2.2	15.5	7.1	5.01667	8.66667	1.3	481	50	29	18.0674
Usnea aurantiacoatra	Trebouxia jamesii	NJ2018039	NJ2018039	1	0	0	0	0	0	0	0	0	0	0	0	1	0	0	0	0	0	1	0	0	0	0	0	0	0	0	1	0	-58.9569	-62.2188	5.06667	7.98333	51.5054	298.316	13.3	-2.2	15.5	7.1	5.01667	8.66667	1.3	481	50	29	18.0674
Ramalina terebrata	Trebouxia arboricola	NJ2018040	NJ2018040	0	1	0	0	0	1	0	0	0	0	0	0	0	0	0	0	0	0	1	0	0	0	0	0	0	1	0	0	0	-58.9569	-62.2188	5.06667	7.98333	51.5054	298.316	13.3	-2.2	15.5	7.1	5.01667	8.66667	1.3	481	50	29	18.0674
Bryoplaca tetraspora	Trebouxia impressa	NJ2018041	NJ2018041	1	0	0	0	0	1	0	0	0	0	0	0	0	0	0	0	0	0	1	0	0	0	0	0	0	0	0	1	0	-58.9569	-62.2188	5.06667	7.98333	51.5054	298.316	13.3	-2.2	15.5	7.1	5.01667	8.66667	1.3	481	50	29	18.0674
Psoroma cinnamomeum	Trebouxia cretacea	NJ2018042	NJ2018042	1	0	0	0	0	1	0	0	0	0	0	0	0	0	0	0	0	0	1	0	0	0	0	0	0	0	0	0	1	-58.9569	-62.2188	5.06667	7.98333	51.5054	298.316	13.3	-2.2	15.5	7.1	5.01667	8.66667	1.3	481	50	29	18.0674
Himantormia lugubris	Trebouxia jamesii	NJ2018044	NJ2018044	1	0	0	0	0	0	0	0	0	0	0	0	0	0	1	0	0	0	1	0	0	0	0	0	0	0	0	1	0	-58.9569	-62.2188	5.06667	7.98333	51.5054	298.316	13.3	-2.2	15.5	7.1	5.01667	8.66667	1.3	481	50	29	18.0674
Himantormia lugubris	Trebouxia jamesii	NJ2018046	NJ2018046	1	0	0	0	0	0	0	0	0	0	0	0	0	0	1	0	0	0	1	0	0	0	0	0	0	0	0	1	0	-58.9569	-62.2188	5.06667	7.98333	51.5054	298.316	13.3	-2.2	15.5	7.1	5.01667	8.66667	1.3	481	50	29	18.0674
Usnea aurantiacoatra	Trebouxia jamesii	NJ2018048	NJ2018048	1	0	0	0	0	0	0	0	0	0	0	0	1	0	0	0	0	0	1	0	0	0	0	0	0	0	0	1	0	-58.9569	-62.2188	5.06667	7.98333	51.5054	298.316	13.3	-2.2	15.5	7.1	5.01667	8.66667	1.3	481	50	29	18.0674
Parmelia saxatilis	Trebouxia jamesii	NJ2018050	NJ2018050	1	1	0	1	0	0	0	0	0	0	0	0	0	0	0	0	0	0	1	0	0	0	0	0	0	0	0	1	0	-58.9569	-62.2188	5.06667	7.98333	51.5054	298.316	13.3	-2.2	15.5	7.1	5.01667	8.66667	1.3	481	50	29	18.0674
Bryoplaca tetraspora	Trebouxia impressa	NJ2018052	NJ2018052	1	0	0	0	0	1	0	0	0	0	0	0	0	0	0	0	0	0	1	0	0	0	0	0	0	0	0	1	0	-58.9569	-62.2188	5.06667	7.98333	51.5054	298.316	13.3	-2.2	15.5	7.1	5.01667	8.66667	1.3	481	50	29	18.0674
Usnea aurantiacoatra	Trebouxia jamesii	NJ2018053	NJ2018053	1	0	0	0	0	0	0	0	0	0	0	0	1	0	0	0	0	0	1	0	0	0	0	0	0	0	0	1	0	-58.9569	-62.2188	5.06667	7.98333	51.5054	298.316	13.3	-2.2	15.5	7.1	5.01667	8.66667	1.3	481	50	29	18.0674
Ramalina terebrata	Trebouxia arboricola	NJ2018054	NJ2018054	0	1	0	0	0	1	0	0	0	0	0	0	0	0	0	0	0	0	1	0	0	0	0	0	0	1	0	0	0	-58.9569	-62.2188	5.06667	7.98333	51.5054	298.316	13.3	-2.2	15.5	7.1	5.01667	8.66667	1.3	481	50	29	18.0674
Usnea aurantiacoatra	Trebouxia jamesii	NJ2018055	NJ2018055	1	0	0	0	0	0	0	0	0	0	0	0	1	0	0	0	0	0	1	0	0	0	0	0	0	0	0	1	0	-58.9569	-62.2188	5.06667	7.98333	51.5054	298.316	13.3	-2.2	15.5	7.1	5.01667	8.66667	1.3	481	50	29	18.0674
Bryoplaca tetraspora	Trebouxia impressa	NJ2018056	NJ2018056	1	0	0	0	0	1	0	0	0	0	0	0	0	0	0	0	0	0	1	0	0	0	0	0	0	0	0	1	0	-58.9569	-62.2188	5.06667	7.98333	51.5054	298.316	13.3	-2.2	15.5	7.1	5.01667	8.66667	1.3	481	50	29	18.0674
Usnea aurantiacoatra	Trebouxia jamesii	NJ2018057	NJ2018057	1	0	0	0	0	0	0	0	0	0	0	0	1	0	0	0	0	0	1	0	0	0	0	0	0	0	0	1	0	-58.9569	-62.2188	5.06667	7.98333	51.5054	298.316	13.3	-2.2	15.5	7.1	5.01667	8.66667	1.3	481	50	29	18.0674
Parmelia saxatilis	Trebouxia jamesii	NJ2018058	NJ2018058	1	1	0	1	0	0	0	0	0	0	0	0	0	0	0	0	0	0	1	0	0	0	0	0	0	0	0	1	0	-58.9569	-62.2188	5.06667	7.98333	51.5054	298.316	13.3	-2.2	15.5	7.1	5.01667	8.66667	1.3	481	50	29	18.0674
Ochrolechia tartarea	Trebouxia jamesii	NJ2018061	NJ2018061	1	0	0	0	0	1	0	0	0	0	0	0	0	0	0	0	0	0	0	1	0	0	0	0	0	0	0	1	0	-58.9569	-62.2188	5.06667	7.98333	51.5054	298.316	13.3	-2.2	15.5	7.1	5.01667	8.66667	1.3	481	50	29	18.0674
Usnea aurantiacoatra	Trebouxia jamesii	NJ2018062	NJ2018062	1	0	0	0	0	0	0	0	0	0	0	0	1	0	0	0	0	0	1	0	0	0	0	0	0	0	0	1	0	-58.9569	-62.2188	5.06667	7.98333	51.5054	298.316	13.3	-2.2	15.5	7.1	5.01667	8.66667	1.3	481	50	29	18.0674
Usnea aurantiacoatra	Trebouxia jamesii	NJ2018063	NJ2018063	1	0	0	0	0	0	0	0	0	0	0	0	1	0	0	0	0	0	1	0	0	0	0	0	0	0	0	1	0	-58.9569	-62.2188	5.06667	7.98333	51.5054	298.316	13.3	-2.2	15.5	7.1	5.01667	8.66667	1.3	481	50	29	18.0674
Parmelia saxatilis	Trebouxia jamesii	NJ2018071	NJ2018071	1	1	0	1	0	0	0	0	0	0	0	0	0	0	0	0	0	0	1	0	0	0	0	0	0	0	0	1	0	-58.9587	-62.2199	5.06667	7.98333	51.5054	298.316	13.3	-2.2	15.5	7.1	5.01667	8.66667	1.3	481	50	29	18.0674
Parmelia saxatilis	Trebouxia jamesii	NJ2018072	NJ2018072	1	1	0	1	0	0	0	0	0	0	0	0	0	0	0	0	0	0	1	0	0	0	0	0	0	0	0	1	0	-58.9587	-62.2199	5.06667	7.98333	51.5054	298.316	13.3	-2.2	15.5	7.1	5.01667	8.66667	1.3	481	50	29	18.0674
Bryoria fuscescens	Trebouxia jamesii	NJ2018073	NJ2018073	0	1	0	0	0	1	0	0	0	0	0	0	0	0	0	0	0	0	1	0	0	0	0	0	0	0	0	1	0	-58.9587	-62.2199	5.06667	7.98333	51.5054	298.316	13.3	-2.2	15.5	7.1	5.01667	8.66667	1.3	481	50	29	18.0674
Megaspora verrucosa	Trebouxia impressa	NJ2018074	NJ2018074	1	0	0	0	0	0	0	0	0	0	0	0	0	0	0	1	0	0	1	0	0	0	0	0	0	0	0	1	0	-58.9587	-62.2199	5.06667	7.98333	51.5054	298.316	13.3	-2.2	15.5	7.1	5.01667	8.66667	1.3	481	50	29	18.0674
Gondwania sublobulata	Trebouxia arboricola	NJ2018075	NJ2018075	1	0	0	0	0	0	0	0	0	0	0	0	0	1	0	0	0	0	1	0	0	0	0	0	0	1	0	0	0	-58.9587	-62.2199	5.06667	7.98333	51.5054	298.316	13.3	-2.2	15.5	7.1	5.01667	8.66667	1.3	481	50	29	18.0674
Gondwania sublobulata	Trebouxia arboricola	NJ2018076	NJ2018076	1	0	0	0	0	0	0	0	0	0	0	0	0	1	0	0	0	0	1	0	0	0	0	0	0	1	0	0	0	-58.9587	-62.2199	5.06667	7.98333	51.5054	298.316	13.3	-2.2	15.5	7.1	5.01667	8.66667	1.3	481	50	29	18.0674
Usnea aurantiacoatra	Trebouxia jamesii	NJ2018077	NJ2018077	1	0	0	0	0	0	0	0	0	0	0	0	1	0	0	0	0	0	1	0	0	0	0	0	0	0	0	1	0	-58.9587	-62.2199	5.06667	7.98333	51.5054	298.316	13.3	-2.2	15.5	7.1	5.01667	8.66667	1.3	481	50	29	18.0674
Lecanora fuscobrunnea	Trebouxia impressa	NJ2018078	NJ2018078	1	0	0	0	0	0	0	0	0	0	0	0	0	0	1	0	0	0	1	0	0	0	0	0	0	0	0	1	0	-58.9587	-62.2199	5.06667	7.98333	51.5054	298.316	13.3	-2.2	15.5	7.1	5.01667	8.66667	1.3	481	50	29	18.0674
Gondwania regalis	Trebouxia impressa	NJ2018079	NJ2018079	1	0	0	0	0	0	0	0	0	0	0	0	1	0	0	0	0	0	0	1	0	0	0	0	0	0	0	1	0	-58.9587	-62.2199	5.06667	7.98333	51.5054	298.316	13.3	-2.2	15.5	7.1	5.01667	8.66667	1.3	481	50	29	18.0674
Ramalina terebrata	Trebouxia arboricola	NJ2018080	NJ2018080	0	1	0	0	0	1	0	0	0	0	0	0	0	0	0	0	0	0	1	0	0	0	0	0	0	1	0	0	0	-58.9587	-62.2199	5.06667	7.98333	51.5054	298.316	13.3	-2.2	15.5	7.1	5.01667	8.66667	1.3	481	50	29	18.0674
Rhizoplaca chrysoleuca clade B	Trebouxia impressa	NMG20151298	NMG20151298	1	0	0	0	0	0	0	0	0	1	0	0	0	0	0	0	0	0	1	0	0	0	0	0	0	0	0	1	0	118.695	44.2281	0.6375	13.2083	27.4602	1342.84	23.8	-24.3	48.1	16.4833	-16.5833	16.4833	-16.5833	424	134	2	123.879
Rhizoplaca chrysoleuca clade F	Trebouxia impressa	NMG20151339	NMG20151339	1	0	0	0	0	0	0	0	0	1	0	0	0	0	0	0	0	0	0	1	0	0	0	0	0	0	0	1	0	118.695	44.2281	0.6375	13.2083	27.4602	1342.84	23.8	-24.3	48.1	16.4833	-16.5833	16.4833	-16.5833	424	134	2	123.879
Rhizoplaca chrysoleuca clade F	Trebouxia impressa	NMG20151402	NMG20151402	1	0	0	0	0	0	0	0	0	1	0	0	0	0	0	0	0	0	0	1	0	0	0	0	0	0	0	1	0	118.695	44.2281	0.6375	13.2083	27.4602	1342.84	23.8	-24.3	48.1	16.4833	-16.5833	16.4833	-16.5833	424	134	2	123.879
Rhizoplaca chrysoleuca clade F	Trebouxia impressa	NMG2015408	NMG2015408	1	0	0	0	0	0	0	0	0	1	0	0	0	0	0	0	0	0	0	1	0	0	0	0	0	0	0	1	0	120.057	51.0567	-4.44583	14.8083	25.0989	1676.05	23.1	-35.9	59	14.85	-26.4167	14.85	-26.4167	454	127	4	113.541
Rhizoplaca chrysoleuca clade F	Trebouxia sp.7	QH12038	QH12038	1	0	0	0	0	0	0	0	0	1	0	0	0	0	0	0	0	0	0	1	0	0	1	0	0	0	0	0	0	99.8667	34.4667	-2.51667	14.2833	38.0889	836.533	13.9	-23.6	37.5	7.01667	-13.3833	7.01667	-13.3833	486	103	3	96.7957
Rhizoplaca chrysoleuca clade F	Trebouxia impressa	QH12098	QH12098	1	0	0	0	0	0	0	0	0	1	0	0	0	0	0	0	0	0	0	1	0	0	0	0	0	0	0	1	0	99.8667	34.4667	-2.51667	14.2833	38.0889	836.533	13.9	-23.6	37.5	7.01667	-13.3833	7.01667	-13.3833	486	103	3	96.7957
Rhizoplaca chrysoleuca clade F	Trebouxia impressa	QH121170	QH121170	1	0	0	0	0	0	0	0	0	1	0	0	0	0	0	0	0	0	0	1	0	0	0	0	0	0	0	1	0	96.4	33.2667	-1	14.2667	40.1878	774.996	15.1	-20.4	35.5	8.06667	-10.0167	8.06667	-10.8333	472	106	2	104.518
Rhizoplaca chrysoleuca clade F	Trebouxia impressa	QH12163	QH12163	1	0	0	0	0	0	0	0	0	1	0	0	0	0	0	0	0	0	0	1	0	0	0	0	0	0	0	1	0	99.8667	34.4667	-2.51667	14.2833	38.0889	836.533	13.9	-23.6	37.5	7.01667	-13.3833	7.01667	-13.3833	486	103	3	96.7957
Rhizoplaca chrysoleuca clade F	Trebouxia impressa	QH12191	QH12191	1	0	0	0	0	0	0	0	0	1	0	0	0	0	0	0	0	0	0	1	0	0	0	0	0	0	0	1	0	99.8667	34.4667	-2.51667	14.2833	38.0889	836.533	13.9	-23.6	37.5	7.01667	-13.3833	7.01667	-13.3833	486	103	3	96.7957
Rhizoplaca chrysoleuca clade F	Trebouxia impressa	QH12203	QH12203	1	0	0	0	0	0	0	0	0	1	0	0	0	0	0	0	0	0	0	1	0	0	0	0	0	0	0	1	0	99.8667	34.4667	-2.51667	14.2833	38.0889	836.533	13.9	-23.6	37.5	7.01667	-13.3833	7.01667	-13.3833	486	103	3	96.7957
Rhizoplaca chrysoleuca clade F	Trebouxia sp.7	QH12636	QH12636	1	0	0	0	0	0	0	0	0	1	0	0	0	0	0	0	0	0	0	1	0	0	1	0	0	0	0	0	0	96.4	33.2667	-1	14.2667	40.1878	774.996	15.1	-20.4	35.5	8.06667	-10.0167	8.06667	-10.8333	472	106	2	104.518
Rhizoplaca chrysoleuca clade F	Trebouxia sp.7	QH12638	QH12638	1	0	0	0	0	0	0	0	0	1	0	0	0	0	0	0	0	0	0	1	0	0	1	0	0	0	0	0	0	96.4	33.2667	-1	14.2667	40.1878	774.996	15.1	-20.4	35.5	8.06667	-10.0167	8.06667	-10.8333	472	106	2	104.518
Rhizoplaca chrysoleuca clade F	Trebouxia sp.7	QH12640	QH12640	1	0	0	0	0	0	0	0	0	1	0	0	0	0	0	0	0	0	0	1	0	0	1	0	0	0	0	0	0	96.4	33.2667	-1	14.2667	40.1878	774.996	15.1	-20.4	35.5	8.06667	-10.0167	8.06667	-10.8333	472	106	2	104.518
Heterodermia japonica	Trebouxia sp.8	QJ2-1	QJ2018001	1	1	1	0	0	0	0	0	0	0	0	0	0	0	0	0	0	0	1	0	0	0	0	1	0	0	0	0	0	104.417	25.3667	15.4792	9.74167	41.4539	524.783	25.1	1.6	23.5	21.05	8.28333	21.05	8.28333	1169	226	16	85.3044
Parmotrema clavuliferum	Trebouxia sp.10	QJ2-10	QJ2018010	0	1	0	0	0	0	0	0	0	0	0	0	0	0	0	0	0	1	0	1	0	0	0	0	0	1	0	0	0	103.85	24.82	14.8458	10.3917	44.7917	482.599	24.3	1.1	23.2	19.9	8.23333	19.9	8.23333	1031	202	14	85.5841
Usnea dasaea	Trebouxia sp.10	QJ2-11	QJ2018011	0	1	0	0	1	0	0	0	0	0	0	0	0	0	0	0	0	0	1	0	0	0	0	0	0	1	0	0	0	104.417	25.3667	15.4792	9.74167	41.4539	524.783	25.1	1.6	23.5	21.05	8.28333	21.05	8.28333	1169	226	16	85.3044
Heterodermia japonica	Trebouxia sp.8	QJ2-2	QJ2018002	1	1	1	0	0	0	0	0	0	0	0	0	0	0	0	0	0	0	1	0	0	0	0	1	0	0	0	0	0	104.417	25.3667	15.4792	9.74167	41.4539	524.783	25.1	1.6	23.5	21.05	8.28333	21.05	8.28333	1169	226	16	85.3044
Hypotrachyna osseoalba	Trebouxia sp.10	QJ2-3	QJ2018003	1	1	0	0	0	0	1	0	0	0	0	0	0	0	0	0	0	0	1	0	0	0	0	0	0	1	0	0	0	104.417	25.3667	15.4792	9.74167	41.4539	524.783	25.1	1.6	23.5	21.05	8.28333	21.05	8.28333	1169	226	16	85.3044
Usnea dasaea	Trebouxia sp.10	QJ2-4	QJ2018004	0	1	0	0	1	0	0	0	0	0	0	0	0	0	0	0	0	0	1	0	0	0	0	0	0	1	0	0	0	104.417	25.3667	15.4792	9.74167	41.4539	524.783	25.1	1.6	23.5	21.05	8.28333	21.05	8.28333	1169	226	16	85.3044
Parmotrema clavuliferum	Trebouxia sp.10	QJ2-5	QJ2018005	0	1	0	0	0	0	0	0	0	0	0	0	0	0	0	0	0	1	0	1	0	0	0	0	0	1	0	0	0	104.417	25.3667	15.4792	9.74167	41.4539	524.783	25.1	1.6	23.5	21.05	8.28333	21.05	8.28333	1169	226	16	85.3044
Parmotrema clavuliferum	Trebouxia sp.10	QJ2-6	QJ2018006	0	1	0	0	0	0	0	0	0	0	0	0	0	0	0	0	0	1	0	1	0	0	0	0	0	1	0	0	0	104.417	25.3667	15.4792	9.74167	41.4539	524.783	25.1	1.6	23.5	21.05	8.28333	21.05	8.28333	1169	226	16	85.3044
Usnea dasaea	Trebouxia sp.10	QJ2-7	QJ2018007	0	1	0	0	1	0	0	0	0	0	0	0	0	0	0	0	0	0	1	0	0	0	0	0	0	1	0	0	0	104.417	25.3667	15.4792	9.74167	41.4539	524.783	25.1	1.6	23.5	21.05	8.28333	21.05	8.28333	1169	226	16	85.3044
Heterodermia japonica	Trebouxia sp.8	QJ2-8	QJ2018008	1	1	1	0	0	0	0	0	0	0	0	0	0	0	0	0	0	0	1	0	0	0	0	1	0	0	0	0	0	104.417	25.3667	15.4792	9.74167	41.4539	524.783	25.1	1.6	23.5	21.05	8.28333	21.05	8.28333	1169	226	16	85.3044
Parmotrema clavuliferum	Trebouxia sp.10	QJ2-9	QJ2018009	0	1	0	0	0	0	0	0	0	0	0	0	0	0	0	0	0	1	0	1	0	0	0	0	0	1	0	0	0	104.417	25.3667	15.4792	9.74167	41.4539	524.783	25.1	1.6	23.5	21.05	8.28333	21.05	8.28333	1169	226	16	85.3044
Punctelia rudecta	Trebouxia anticipata	QJ3-1	QJ2018013	1	1	0	0	1	0	0	0	0	0	0	0	0	0	0	0	0	0	1	0	0	0	0	1	0	0	0	0	0	103.85	24.82	14.8458	10.3917	44.7917	482.599	24.3	1.1	23.2	19.9	8.23333	19.9	8.23333	1031	202	14	85.5841
Ramalina calicaris	Trebouxia sp.9	QJ3-2	QJ2018014	1	0	0	1	0	0	0	0	0	0	0	0	0	0	0	0	0	0	0	1	0	0	0	1	0	0	0	0	0	103.85	24.82	14.8458	10.3917	44.7917	482.599	24.3	1.1	23.2	19.9	8.23333	19.9	8.23333	1031	202	14	85.5841
Flavoparmelia caperata	Trebouxia anticipata	QJ3-3	QJ2018015	1	1	0	0	1	0	0	0	0	0	0	0	0	0	0	0	0	0	1	0	0	0	0	1	0	0	0	0	0	103.85	24.82	14.8458	10.3917	44.7917	482.599	24.3	1.1	23.2	19.9	8.23333	19.9	8.23333	1031	202	14	85.5841
Heterodermia speciosa	Trebouxia sp.8	QJ3-4	QJ2018016	1	1	0	0	0	0	1	0	0	0	0	0	0	0	0	0	0	0	1	0	0	0	0	1	0	0	0	0	0	103.85	24.82	14.8458	10.3917	44.7917	482.599	24.3	1.1	23.2	19.9	8.23333	19.9	8.23333	1031	202	14	85.5841
Punctelia rudecta	Trebouxia anticipata	QJ3-7	QJ2018019	1	1	0	0	1	0	0	0	0	0	0	0	0	0	0	0	0	0	1	0	0	0	0	1	0	0	0	0	0	103.85	24.82	14.8458	10.3917	44.7917	482.599	24.3	1.1	23.2	19.9	8.23333	19.9	8.23333	1031	202	14	85.5841
Parmotrema clavuliferum	Trebouxia sp.10	QJ3-9	QJ2018021	0	1	0	0	0	0	0	0	0	0	0	0	0	0	0	0	0	1	0	1	0	0	0	0	0	1	0	0	0	103.85	24.82	14.8458	10.3917	44.7917	482.599	24.3	1.1	23.2	19.9	8.23333	19.9	8.23333	1031	202	14	85.5841
Usnea dasaea	Trebouxia sp.10	QJ4-1	QJ2018023	0	1	0	0	1	0	0	0	0	0	0	0	0	0	0	0	0	0	1	0	0	0	0	0	0	1	0	0	0	103.86	24.82	14.8458	10.3917	44.7917	482.599	24.3	1.1	23.2	19.9	8.23333	19.9	8.23333	1031	202	14	85.5841
Parmotrema clavuliferum	Trebouxia sp.10	QJ4-10	QJ2018032	0	1	0	0	0	0	0	0	0	0	0	0	0	0	0	0	0	1	0	1	0	0	0	0	0	1	0	0	0	103.86	24.82	14.8458	10.3917	44.7917	482.599	24.3	1.1	23.2	19.9	8.23333	19.9	8.23333	1031	202	14	85.5841
Heterodermia japonica	Trebouxia sp.8	QJ4-11	QJ2018033	1	1	1	0	0	0	0	0	0	0	0	0	0	0	0	0	0	0	1	0	0	0	0	1	0	0	0	0	0	103.86	24.82	14.8458	10.3917	44.7917	482.599	24.3	1.1	23.2	19.9	8.23333	19.9	8.23333	1031	202	14	85.5841
Hypotrachyna osseoalba	Trebouxia sp.10	QJ4-12	QJ2018034	1	1	0	0	0	0	1	0	0	0	0	0	0	0	0	0	0	0	1	0	0	0	0	0	0	1	0	0	0	103.86	24.82	14.8458	10.3917	44.7917	482.599	24.3	1.1	23.2	19.9	8.23333	19.9	8.23333	1031	202	14	85.5841
Parmotrema clavuliferum	Trebouxia sp.10	QJ4-2	QJ2018024	0	1	0	0	0	0	0	0	0	0	0	0	0	0	0	0	0	1	0	1	0	0	0	0	0	1	0	0	0	103.86	24.82	14.8458	10.3917	44.7917	482.599	24.3	1.1	23.2	19.9	8.23333	19.9	8.23333	1031	202	14	85.5841
Menegazzia subsimilis	Trebouxia sp.4	QJ4-3	QJ2018025	0	1	0	1	0	0	0	0	0	0	0	0	0	0	0	0	0	0	1	0	0	0	1	0	0	0	0	0	0	103.86	24.82	14.8458	10.3917	44.7917	482.599	24.3	1.1	23.2	19.9	8.23333	19.9	8.23333	1031	202	14	85.5841
Parmotrema clavuliferum	Trebouxia sp.10	QJ4-4	QJ2018026	0	1	0	0	0	0	0	0	0	0	0	0	0	0	0	0	0	1	0	1	0	0	0	0	0	1	0	0	0	103.86	24.82	14.8458	10.3917	44.7917	482.599	24.3	1.1	23.2	19.9	8.23333	19.9	8.23333	1031	202	14	85.5841
Hypotrachyna osseoalba	Trebouxia sp.10	QJ4-5	QJ2018027	1	1	0	0	0	0	1	0	0	0	0	0	0	0	0	0	0	0	1	0	0	0	0	0	0	1	0	0	0	103.86	24.82	14.8458	10.3917	44.7917	482.599	24.3	1.1	23.2	19.9	8.23333	19.9	8.23333	1031	202	14	85.5841
Menegazzia subsimilis	Trebouxia sp.4	QJ4-6	QJ2018028	0	1	0	1	0	0	0	0	0	0	0	0	0	0	0	0	0	0	1	0	0	0	1	0	0	0	0	0	0	103.86	24.82	14.8458	10.3917	44.7917	482.599	24.3	1.1	23.2	19.9	8.23333	19.9	8.23333	1031	202	14	85.5841
Parmotrema clavuliferum	Trebouxia sp.9	QJ4-7	QJ2018029	0	1	0	0	0	0	0	0	0	0	0	0	0	0	0	0	0	1	0	1	0	0	0	1	0	0	0	0	0	103.86	24.82	14.8458	10.3917	44.7917	482.599	24.3	1.1	23.2	19.9	8.23333	19.9	8.23333	1031	202	14	85.5841
Flavoparmelia caperata	Trebouxia anticipata	QJ4-8	QJ2018030	1	1	0	0	1	0	0	0	0	0	0	0	0	0	0	0	0	0	1	0	0	0	0	1	0	0	0	0	0	103.86	24.82	14.8458	10.3917	44.7917	482.599	24.3	1.1	23.2	19.9	8.23333	19.9	8.23333	1031	202	14	85.5841
Usnea dasaea	Trebouxia sp.10	QJ4-9	QJ2018031	0	1	0	0	1	0	0	0	0	0	0	0	0	0	0	0	0	0	1	0	0	0	0	0	0	1	0	0	0	103.86	24.82	14.8458	10.3917	44.7917	482.599	24.3	1.1	23.2	19.9	8.23333	19.9	8.23333	1031	202	14	85.5841
Hypotrachyna osseoalba	Trebouxia sp.10	QJ5-1	QJ2018036	1	1	0	0	0	0	1	0	0	0	0	0	0	0	0	0	0	0	1	0	0	0	0	0	0	1	0	0	0	103.85	24.82	14.8458	10.3917	44.7917	482.599	24.3	1.1	23.2	19.9	8.23333	19.9	8.23333	1031	202	14	85.5841
Parmotrema clavuliferum	Trebouxia sp.10	QJ5-10	QJ2018045	0	1	0	0	0	0	0	0	0	0	0	0	0	0	0	0	0	1	0	1	0	0	0	0	0	1	0	0	0	103.85	24.82	14.8458	10.3917	44.7917	482.599	24.3	1.1	23.2	19.9	8.23333	19.9	8.23333	1031	202	14	85.5841
Usnea dasaea	Trebouxia sp.10	QJ5-2	QJ2018037	0	1	0	0	1	0	0	0	0	0	0	0	0	0	0	0	0	0	1	0	0	0	0	0	0	1	0	0	0	103.85	24.82	14.8458	10.3917	44.7917	482.599	24.3	1.1	23.2	19.9	8.23333	19.9	8.23333	1031	202	14	85.5841
Parmotrema clavuliferum	Trebouxia sp.10	QJ5-3	QJ2018038	0	1	0	0	0	0	0	0	0	0	0	0	0	0	0	0	0	1	0	1	0	0	0	0	0	1	0	0	0	103.85	24.82	14.8458	10.3917	44.7917	482.599	24.3	1.1	23.2	19.9	8.23333	19.9	8.23333	1031	202	14	85.5841
Hypotrachyna osseoalba	Trebouxia sp.10	QJ5-4	QJ2018039	1	1	0	0	0	0	1	0	0	0	1	0	0	0	0	0	0	0	1	0	0	0	0	0	0	1	0	0	0	103.85	24.82	14.8458	10.3917	44.7917	482.599	24.3	1.1	23.2	19.9	8.23333	19.9	8.23333	1031	202	14	85.5841
Ramalina calicaris	Trebouxia sp.10	QJ5-5	QJ2018040	1	0	0	1	0	0	0	0	0	0	0	0	0	0	0	0	0	0	0	1	0	0	0	0	0	1	0	0	0	103.85	24.82	14.8458	10.3917	44.7917	482.599	24.3	1.1	23.2	19.9	8.23333	19.9	8.23333	1031	202	14	85.5841
Parmotrema clavuliferum	Trebouxia sp.10	QJ5-6	QJ2018041	0	1	0	0	0	0	0	0	0	0	0	0	0	0	0	0	0	1	0	1	0	0	0	0	0	1	0	0	0	103.85	24.82	14.8458	10.3917	44.7917	482.599	24.3	1.1	23.2	19.9	8.23333	19.9	8.23333	1031	202	14	85.5841
Hypotrachyna osseoalba	Trebouxia sp.10	QJ5-7	QJ2018042	1	1	0	0	0	0	1	0	0	0	1	0	0	0	0	0	0	0	1	0	0	0	0	0	0	1	0	0	0	103.85	24.82	14.8458	10.3917	44.7917	482.599	24.3	1.1	23.2	19.9	8.23333	19.9	8.23333	1031	202	14	85.5841
Usnea dasaea	Trebouxia sp.10	QJ5-8	QJ2018043	0	1	0	0	1	0	0	0	0	0	0	0	0	0	0	0	0	0	1	0	0	0	0	0	0	1	0	0	0	103.85	24.82	14.8458	10.3917	44.7917	482.599	24.3	1.1	23.2	19.9	8.23333	19.9	8.23333	1031	202	14	85.5841
Hypotrachyna osseoalba	Trebouxia sp.10	QJ5-9	QJ2018044	1	1	0	0	0	0	1	0	0	0	1	0	0	0	0	0	0	0	1	0	0	0	0	0	0	1	0	0	0	103.85	24.82	14.8458	10.3917	44.7917	482.599	24.3	1.1	23.2	19.9	8.23333	19.9	8.23333	1031	202	14	85.5841
Rhizoplaca chrysoleuca clade F	Trebouxia sp.7	SC201408738	SC201408738	1	0	0	0	0	0	0	0	0	1	0	0	0	0	0	0	0	0	0	1	0	0	1	0	0	0	0	0	0	100.09	29.1898	3.14167	14.3	45.8333	628.855	15.9	-15.3	31.2	10.3167	-4.96667	10.3167	-4.96667	649	178	2	118.237
Rhizoplaca chrysoleuca clade F	Trebouxia sp.7	SC201408768	SC201408768	1	0	0	0	0	0	0	0	0	1	0	0	0	0	0	0	0	0	0	1	0	0	1	0	0	0	0	0	0	100.09	29.1905	3.14167	14.3	45.8333	628.855	15.9	-15.3	31.2	10.3167	-4.96667	10.3167	-4.96667	649	178	2	118.237
Rhizoplaca chrysoleuca clade F	Trebouxia sp.7	SC201408782	SC201408782	1	0	0	0	0	0	0	0	0	1	0	0	0	0	0	0	0	0	0	1	0	0	1	0	0	0	0	0	0	100.09	29.1905	3.14167	14.3	45.8333	628.855	15.9	-15.3	31.2	10.3167	-4.96667	10.3167	-4.96667	649	178	2	118.237
Hypogymnia hypotrypa	Trebouxia sp.5	SC201408833	SC201408833	1	1	0	0	0	0	0	0	0	0	1	0	0	0	0	0	0	0	1	0	0	0	1	0	0	0	0	0	0	100.7	30.1167	3.24167	14.3167	45.7401	627.056	16.3	-15	31.3	10.3833	-3.95	10.3833	-4.91667	747	176	2	109.009
Hypogymnia hypotrypa	Trebouxia sp.5	SC201408834	SC201408834	1	1	0	0	0	0	0	0	0	0	1	0	0	0	0	0	0	0	1	0	0	0	1	0	0	0	0	0	0	100.7	30.1167	3.24167	14.3167	45.7401	627.056	16.3	-15	31.3	10.3833	-3.95	10.3833	-4.91667	747	176	2	109.009
Hypogymnia hypotrypa	Trebouxia sp.5	SC201408835	SC201408835	1	1	0	0	0	0	0	0	0	0	1	0	0	0	0	0	0	0	1	0	0	0	1	0	0	0	0	0	0	100.7	30.1167	3.24167	14.3167	45.7401	627.056	16.3	-15	31.3	10.3833	-3.95	10.3833	-4.91667	747	176	2	109.009
Diplotomma alboatrum	Trebouxia cretacea	SPT11013	SPT11013	1	0	0	1	0	0	0	0	0	0	0	0	0	0	0	0	0	0	0	0	0	1	0	0	0	0	0	0	1	104.584	37.4142	8.06667	13.5833	31.3703	1081.25	28.4	-14.9	43.3	19.2833	-6.11667	20.7667	-6.11667	206	59	1	103.993
Diplotomma alboatrum	Trebouxia cretacea	SPT11015	SPT11015	1	0	0	1	0	0	0	0	0	0	0	0	0	0	0	0	0	0	0	0	0	1	0	0	0	0	0	0	1	104.584	37.4142	8.06667	13.5833	31.3703	1081.25	28.4	-14.9	43.3	19.2833	-6.11667	20.7667	-6.11667	206	59	1	103.993
Squamarina kansuensis	Trebouxia cretacea	SPT1251	SPT1251	1	0	0	0	0	0	0	0	0	0	0	1	0	0	0	0	0	0	1	0	0	0	0	0	0	0	0	0	1	104.584	37.4142	8.06667	13.5833	31.3703	1081.25	28.4	-14.9	43.3	19.2833	-6.11667	20.7667	-6.11667	206	59	1	103.993
Hypogymnia hypotrypa	Trebouxia sp.5	SXM1	SXM1	1	1	0	0	0	0	0	0	0	0	1	0	0	0	0	0	0	0	1	0	0	0	1	0	0	0	0	0	0	107.781	33.9156	4.16667	7.45	25.3401	788.558	18.7	-10.7	29.4	12.8667	-5.76667	13.9	-5.76667	945	170	9	77.2189
Hypogymnia hypotrypa	Trebouxia sp.5	SXM2	SXM2	1	1	0	0	0	0	0	0	0	0	1	0	0	0	0	0	0	0	1	0	0	0	1	0	0	0	0	0	0	107.728	34.01	5.14167	7.68333	25.4415	807.389	20.1	-10.1	30.2	13.9833	-5.05	15.1	-5.05	897	163	8	78.1688
Hypogymnia hypotrypa	Trebouxia sp.5	SXM3	SXM3	1	1	0	0	0	0	0	0	0	0	1	0	0	0	0	0	0	0	1	0	0	0	1	0	0	0	0	0	0	107.768	33.9443	0.908333	7.13333	25.1174	757.123	14.8	-13.6	28.4	9.33333	-8.58333	10.2833	-8.58333	1006	181	10	76.8685
Hypogymnia hypotrypa	Trebouxia sp.5	T2	T2	1	1	0	0	0	0	0	0	0	0	1	0	0	0	0	0	0	0	1	0	0	0	1	0	0	0	0	0	0	121.17	24.08	14.7417	7.38333	45.5761	336.289	22	5.8	16.2	17.75	11.6333	18.3667	10.3167	2448	341	61	55.4684
Hypogymnia hypotrypa	Trebouxia sp.5	T4	T4	1	1	0	0	0	0	0	0	0	0	1	0	0	0	0	0	0	0	1	0	0	0	1	0	0	0	0	0	0	121.17	24.08	14.7417	7.38333	45.5761	336.289	22	5.8	16.2	17.75	11.6333	18.3667	10.3167	2448	341	61	55.4684
Hypogymnia hypotrypa	Trebouxia sp.5	TI	TI	1	1	0	0	0	0	0	0	0	0	1	0	0	0	0	0	0	0	1	0	0	0	1	0	0	0	0	0	0	121.17	24.08	14.7417	7.38333	45.5761	336.289	22	5.8	16.2	17.75	11.6333	18.3667	10.3167	2448	341	61	55.4684
Parmotrema tinctorum	Trebouxia corticola	WYS2017162	WYS2017162	1	1	0	0	0	0	1	0	0	0	0	0	0	0	0	0	0	0	1	0	0	0	1	0	0	0	0	0	0	117.773	27.6992	16.5167	7.75	27.8777	731.742	29.9	2.1	27.8	19.8667	9.05	25.1	7.23333	2062	361	51	61.8322
Parmotrema tinctorum	Trebouxia corticola	WYS2017163	WYS2017163	1	1	0	0	0	0	1	0	0	0	0	0	0	0	0	0	0	0	1	0	0	0	1	0	0	0	0	0	0	117.773	27.6992	16.5167	7.75	27.8777	731.742	29.9	2.1	27.8	19.8667	9.05	25.1	7.23333	2062	361	51	61.8322
Parmotrema tinctorum	Trebouxia corticola	WYS2017164	WYS2017164	1	1	0	0	0	0	1	0	0	0	0	0	0	0	0	0	0	0	1	0	0	0	1	0	0	0	0	0	0	117.773	27.6992	16.5167	7.75	27.8777	731.742	29.9	2.1	27.8	19.8667	9.05	25.1	7.23333	2062	361	51	61.8322
Heterodermia japonica	Trebouxia sp.8	XA2017017	XA2017017	1	1	1	0	0	0	0	0	0	0	0	0	0	0	0	0	0	0	1	0	0	0	0	1	0	0	0	0	0	110.434	25.8836	11.3458	7.325	27.5376	711.983	24.1	-2.5	26.6	15	4.08333	19.6667	2.16667	1672	290	48	56.581
Heterodermia japonica	Trebouxia sp.8	XA2017038	XA2017038	1	1	1	0	0	0	0	0	0	0	0	0	0	0	0	0	0	0	1	0	0	0	0	1	0	0	0	0	0	110.434	25.8836	11.3458	7.325	27.5376	711.983	24.1	-2.5	26.6	15	4.08333	19.6667	2.16667	1672	290	48	56.581
Heterodermia japonica	Trebouxia sp.8	XA2017052	XA2017052	1	1	1	0	0	0	0	0	0	0	0	0	0	0	0	0	0	0	1	0	0	0	0	1	0	0	0	0	0	110.434	25.8836	11.3458	7.325	27.5376	711.983	24.1	-2.5	26.6	15	4.08333	19.6667	2.16667	1672	290	48	56.581
Heterodermia japonica	Trebouxia sp.8	XA2017053	XA2017053	1	1	1	0	0	0	0	0	0	0	0	0	0	0	0	0	0	0	1	0	0	0	0	1	0	0	0	0	0	110.434	25.8836	11.3458	7.325	27.5376	711.983	24.1	-2.5	26.6	15	4.08333	19.6667	2.16667	1672	290	48	56.581
Heterodermia japonica	Trebouxia sp.8	XA2017054	XA2017054	1	1	1	0	0	0	0	0	0	0	0	0	0	0	0	0	0	0	1	0	0	0	0	1	0	0	0	0	0	110.413	25.88	13.0333	7.55	27.5547	732.162	26.3	-1.1	27.4	16.75	5.56667	21.5667	3.6	1630	285	49	56.4601
Heterodermia japonica	Trebouxia sp.8	XA2017058	XA2017058	1	1	1	0	0	0	0	0	0	0	0	0	0	0	0	0	0	0	1	0	0	0	0	1	0	0	0	0	0	110.413	25.88	13.0333	7.55	27.5547	732.162	26.3	-1.1	27.4	16.75	5.56667	21.5667	3.6	1630	285	49	56.4601
Heterodermia japonica	Trebouxia sp.8	XA2017059	XA2017059	1	1	1	0	0	0	0	0	0	0	0	0	0	0	0	0	0	0	1	0	0	0	0	1	0	0	0	0	0	110.413	25.88	13.0333	7.55	27.5547	732.162	26.3	-1.1	27.4	16.75	5.56667	21.5667	3.6	1630	285	49	56.4601
Parmotrema tinctorum	Trebouxia corticola	XTM2017001	XTM2017001	1	1	0	0	0	0	1	0	0	0	0	0	0	0	0	0	0	0	1	0	0	0	1	0	0	0	0	0	0	119.442	30.3183	14.5542	7.775	24.4497	877.197	30.5	-1.3	31.8	22.6833	10.3333	25.1333	3.5	1453	235	46	50.7842
Parmotrema tinctorum	Trebouxia corticola	XTM2017002	XTM2017002	1	1	0	0	0	0	1	0	0	0	0	0	0	0	0	0	0	0	1	0	0	0	1	0	0	0	0	0	0	119.442	30.3183	14.5542	7.775	24.4497	877.197	30.5	-1.3	31.8	22.6833	10.3333	25.1333	3.5	1453	235	46	50.7842
Parmotrema tinctorum	Trebouxia corticola	XTM2017003	XTM2017003	1	1	0	0	0	0	1	0	0	0	0	0	0	0	0	0	0	0	1	0	0	0	1	0	0	0	0	0	0	119.442	30.3183	14.5542	7.775	24.4497	877.197	30.5	-1.3	31.8	22.6833	10.3333	25.1333	3.5	1453	235	46	50.7842
Heterodermia japonica	Trebouxia sp.8	XTM2017084	XTM2017084	1	1	1	0	0	0	0	0	0	0	0	0	0	0	0	0	0	0	1	0	0	0	0	1	0	0	0	0	0	119.431	30.3472	12.1	7.45	24.1883	846.071	27.3	-3.5	30.8	22.3167	3.55	22.3167	1.41667	1566	242	46	49.7548
Heterodermia japonica	Trebouxia sp.8	XTM2017089	XTM2017089	1	1	1	0	0	0	0	0	0	0	0	0	0	0	0	0	0	0	1	0	0	0	0	1	0	0	0	0	0	119.436	30.3361	12.1	7.45	24.1883	846.071	27.3	-3.5	30.8	22.3167	3.55	22.3167	1.41667	1566	242	46	49.7548
Heterodermia japonica	Trebouxia sp.8	XTM2017106	XTM2017106	1	1	1	0	0	0	0	0	0	0	0	0	0	0	0	0	0	0	1	0	0	0	0	1	0	0	0	0	0	119.436	30.3361	12.1	7.45	24.1883	846.071	27.3	-3.5	30.8	22.3167	3.55	22.3167	1.41667	1566	242	46	49.7548
Heterodermia japonica	Trebouxia sp.8	XTM2017108	XTM2017108	1	1	1	0	0	0	0	0	0	0	0	0	0	0	0	0	0	0	1	0	0	0	0	1	0	0	0	0	0	119.436	30.3361	12.1	7.45	24.1883	846.071	27.3	-3.5	30.8	22.3167	3.55	22.3167	1.41667	1566	242	46	49.7548
Heterodermia japonica	Trebouxia sp.8	XTM2017109	XTM2017109	1	1	1	0	0	0	0	0	0	0	0	0	0	0	0	0	0	0	1	0	0	0	0	1	0	0	0	0	0	119.436	30.3361	12.1	7.45	24.1883	846.071	27.3	-3.5	30.8	22.3167	3.55	22.3167	1.41667	1566	242	46	49.7548
Heterodermia japonica	Trebouxia sp.8	XTM2017110	XTM2017110	1	1	1	0	0	0	0	0	0	0	0	0	0	0	0	0	0	0	1	0	0	0	0	1	0	0	0	0	0	119.436	30.3361	12.1	7.45	24.1883	846.071	27.3	-3.5	30.8	22.3167	3.55	22.3167	1.41667	1566	242	46	49.7548
Heterodermia japonica	Trebouxia sp.8	XTM2017112	XTM2017112	1	1	1	0	0	0	0	0	0	0	0	0	0	0	0	0	0	0	1	0	0	0	0	1	0	0	0	0	0	119.436	30.3361	12.1	7.45	24.1883	846.071	27.3	-3.5	30.8	22.3167	3.55	22.3167	1.41667	1566	242	46	49.7548
Hypogymnia hypotrypa	Trebouxia sp.5	XZ20140101	XZ20140101	1	1	0	0	0	0	0	0	0	0	1	0	0	0	0	0	0	0	1	0	0	0	1	0	0	0	0	0	0	94.7152	29.6519	5.56667	12.9167	44.6943	595.77	18.5	-10.4	28.9	12.5667	-1.98333	12.5667	-1.98333	567	119	2	96.7214
Hypogymnia hypotrypa	Trebouxia sp.5	XZ20140833	XZ20140833	1	1	0	0	0	0	0	0	0	0	1	0	0	0	0	0	0	0	1	0	0	0	1	0	0	0	0	0	0	97.4642	28.66	8.0625	11.3417	44.3034	541.362	19.4	-6.2	25.6	14.3667	2.26667	14.3667	1.18333	954	207	7	90.5509
Hypogymnia hypotrypa	Trebouxia sp.5	XZ20140834	XZ20140834	1	1	0	0	0	0	0	0	0	0	1	0	0	0	0	0	0	0	1	0	0	0	1	0	0	0	0	0	0	97.4642	28.66	8.0625	11.3417	44.3034	541.362	19.4	-6.2	25.6	14.3667	2.26667	14.3667	1.18333	954	207	7	90.5509
Hypogymnia hypotrypa	Trebouxia sp.5	XZ2014235	XZ2014235	1	1	0	0	0	0	0	0	0	0	1	0	0	0	0	0	0	0	1	0	0	0	1	0	0	0	0	0	0	94.7388	29.7638	6.5875	12.8917	44.6078	595.884	19.6	-9.3	28.9	13.55	-1.01667	13.55	-1.01667	594	123	2	96.569
Hypogymnia hypotrypa	Trebouxia sp.5	XZ2014237	XZ2014237	1	1	0	0	0	0	0	0	0	0	1	0	0	0	0	0	0	0	1	0	0	0	1	0	0	0	0	0	0	94.7388	29.7638	6.5875	12.8917	44.6078	595.884	19.6	-9.3	28.9	13.55	-1.01667	13.55	-1.01667	594	123	2	96.569
Hypogymnia hypotrypa	Trebouxia sp.5	XZ2014244	XZ2014244	1	1	0	0	0	0	0	0	0	0	1	0	0	0	0	0	0	0	1	0	0	0	1	0	0	0	0	0	0	94.7388	29.7638	6.5875	12.8917	44.6078	595.884	19.6	-9.3	28.9	13.55	-1.01667	13.55	-1.01667	594	123	2	96.569
Hypogymnia hypotrypa	Trebouxia sp.5	XZ2014452	XZ2014452	1	1	0	0	0	0	0	0	0	0	1	0	0	0	0	0	0	0	1	0	0	0	1	0	0	0	0	0	0	95.1973	30.0588	10.9542	12.7417	44.2419	598.488	23.9	-4.9	28.8	17.8167	4.03333	17.8167	3.16667	896	187	3	97.172
Hypogymnia hypotrypa	Trebouxia sp.5	XZ2014467	XZ2014467	1	1	0	0	0	0	0	0	0	0	1	0	0	0	0	0	0	0	1	0	0	0	1	0	0	0	0	0	0	95.1973	30.0588	10.9542	12.7417	44.2419	598.488	23.9	-4.9	28.8	17.8167	4.03333	17.8167	3.16667	896	187	3	97.172
Hypogymnia hypotrypa	Trebouxia sp.5	XZ2014472	XZ2014472	1	1	0	0	0	0	0	0	0	0	1	0	0	0	0	0	0	0	1	0	0	0	1	0	0	0	0	0	0	95.1973	30.0588	10.9542	12.7417	44.2419	598.488	23.9	-4.9	28.8	17.8167	4.03333	17.8167	3.16667	896	187	3	97.172
Hypogymnia hypotrypa	Trebouxia sp.5	YN201408258	YN201408258	1	1	0	0	0	0	0	0	0	0	1	0	0	0	0	0	0	0	1	0	0	0	1	0	0	0	0	0	0	100.176	26.9907	10.2083	11.6	48.5356	474.801	20.1	-3.8	23.9	15.6167	4.08333	15.6167	4.08333	961	236	4	106.346
Hypogymnia hypotrypa	Trebouxia sp.5	YN201408266	YN201408266	1	1	0	0	0	0	0	0	0	0	1	0	0	0	0	0	0	0	1	0	0	0	1	0	0	0	0	0	0	100.176	26.9907	10.2083	11.6	48.5356	474.801	20.1	-3.8	23.9	15.6167	4.08333	15.6167	4.08333	961	236	4	106.346
Hypogymnia hypotrypa	Trebouxia sp.5	YN201408271	YN201408271	1	1	0	0	0	0	0	0	0	0	1	0	0	0	0	0	0	0	1	0	0	0	1	0	0	0	0	0	0	100.176	26.9907	10.2083	11.6	48.5356	474.801	20.1	-3.8	23.9	15.6167	4.08333	15.6167	4.08333	961	236	4	106.346
Hypogymnia hypotrypa	Trebouxia sp.5	YN201408573	YN201408573	1	1	0	0	0	0	0	0	0	0	1	0	0	0	0	0	0	0	1	0	0	0	1	0	0	0	0	0	0	99.094	28.344	1.73333	11.1667	43.6198	555.752	13	-12.6	25.6	8.23333	-3.96667	8.23333	-5.18333	684	158	6	92.9478
Hypogymnia hypotrypa	Trebouxia sp.5	YN201408577	YN201408577	1	1	0	0	0	0	0	0	0	0	1	0	0	0	0	0	0	0	1	0	0	0	1	0	0	0	0	0	0	99.094	28.344	1.73333	11.1667	43.6198	555.752	13	-12.6	25.6	8.23333	-3.96667	8.23333	-5.18333	684	158	6	92.9478
Heterodermia japonica	Trebouxia sp.8	YT2017019	YT2017019	1	1	1	0	0	0	0	0	0	0	0	0	0	0	0	0	0	0	1	0	0	0	0	1	0	0	0	0	0	118.995	25.7786	17.2375	6.75833	29.0057	605.693	28.8	5.5	23.3	24.3167	11.7	24.3667	9.71667	1570	254	35	57.5166
Heterodermia japonica	Trebouxia sp.8	YT2017026	YT2017026	1	1	1	0	0	0	0	0	0	0	0	0	0	0	0	0	0	0	1	0	0	0	0	1	0	0	0	0	0	118.995	25.7786	17.2375	6.75833	29.0057	605.693	28.8	5.5	23.3	24.3167	11.7	24.3667	9.71667	1570	254	35	57.5166
Parmotrema clavuliferum	Trebouxia sp.10	YT2017085	YT2017085	0	1	0	0	0	0	0	0	0	0	0	0	0	0	0	0	0	1	0	1	0	0	0	0	0	1	0	0	0	118.996	25.7681	17.2375	6.75833	29.0057	605.693	28.8	5.5	23.3	24.3167	11.7	24.3667	9.71667	1570	254	35	57.5166
Heterodermia japonica	Trebouxia sp.8	YT2017087	YT2017087	1	1	1	0	0	0	0	0	0	0	0	0	0	0	0	0	0	0	1	0	0	0	0	1	0	0	0	0	0	118.995	25.7786	17.2375	6.75833	29.0057	605.693	28.8	5.5	23.3	24.3167	11.7	24.3667	9.71667	1570	254	35	57.5166
Parmotrema clavuliferum	Trebouxia sp.10	YT2017107	YT2017107	0	1	0	0	0	0	0	0	0	0	0	0	0	0	0	0	0	1	0	1	0	0	0	0	0	1	0	0	0	118.996	25.765	17.2375	6.75833	29.0057	605.693	28.8	5.5	23.3	24.3167	11.7	24.3667	9.71667	1570	254	35	57.5166
Parmotrema tinctorum	Trebouxia corticola	YT2017207	YT2017207	1	1	0	0	0	0	1	0	0	0	0	0	0	0	0	0	0	0	1	0	0	0	1	0	0	0	0	0	0	119.004	25.7736	16.9917	6.7	28.8793	604.659	28.5	5.3	23.2	24.0667	11.5	24.1167	9.5	1589	257	35	57.7139
Parmotrema clavuliferum	Trebouxia sp.10	YT2017208	YT2017208	0	1	0	0	0	0	0	0	0	0	0	0	0	0	0	0	0	1	0	1	0	0	0	0	0	1	0	0	0	119.004	25.7736	16.9917	6.7	28.8793	604.659	28.5	5.3	23.2	24.0667	11.5	24.1167	9.5	1589	257	35	57.7139
Parmotrema tinctorum	Trebouxia corticola	YT2017209	YT2017209	1	1	0	0	0	0	1	0	0	0	0	0	0	0	0	0	0	0	1	0	0	0	1	0	0	0	0	0	0	119.004	25.7736	16.9917	6.7	28.8793	604.659	28.5	5.3	23.2	24.0667	11.5	24.1167	9.5	1589	257	35	57.7139
Parmotrema clavuliferum	Trebouxia sp.10	YT2017210	YT2017210	0	1	0	0	0	0	0	0	0	0	0	0	0	0	0	0	0	1	0	1	0	0	0	0	0	1	0	0	0	119.004	25.7736	16.9917	6.7	28.8793	604.659	28.5	5.3	23.2	24.0667	11.5	24.1167	9.5	1589	257	35	57.7139
Parmotrema tinctorum	Trebouxia corticola	YT2017211	YT2017211	1	1	0	0	0	0	1	0	0	0	0	0	0	0	0	0	0	0	1	0	0	0	1	0	0	0	0	0	0	119.004	25.7736	16.9917	6.7	28.8793	604.659	28.5	5.3	23.2	24.0667	11.5	24.1167	9.5	1589	257	35	57.7139
Squamarina kansuensis	Trebouxia cretacea	ZW11064	ZW11064	1	0	0	0	0	0	0	0	0	0	0	1	0	0	0	0	0	0	1	0	0	0	0	0	0	0	0	0	1	105.392	37.0736	7.50417	12.9917	31.23	1035.58	27.1	-14.5	41.6	18.25	-6.1	19.6667	-6.1	265	71	1	100.655
Squamarina kansuensis	Trebouxia cretacea	ZW11077	ZW11077	1	0	0	0	0	0	0	0	0	0	0	1	0	0	0	0	0	0	1	0	0	0	0	0	0	0	0	0	1	105.392	37.0736	7.50417	12.9917	31.23	1035.58	27.1	-14.5	41.6	18.25	-6.1	19.6667	-6.1	265	71	1	100.655
[truncated: 4 more columns]
