# Supplementary material for: Fungal-Algal Association Drives Lichen Mutualistic Symbiosis: A Case Study With Trebouxia-Related Lichens
Source: Preprints.org preprint supplement (doi:10.20944/preprints202305.1720.v1), 2023-05-25
Supplement: Supplementary file 1 [file supplementary › Supplementary Materials/Figure S2.pdf]

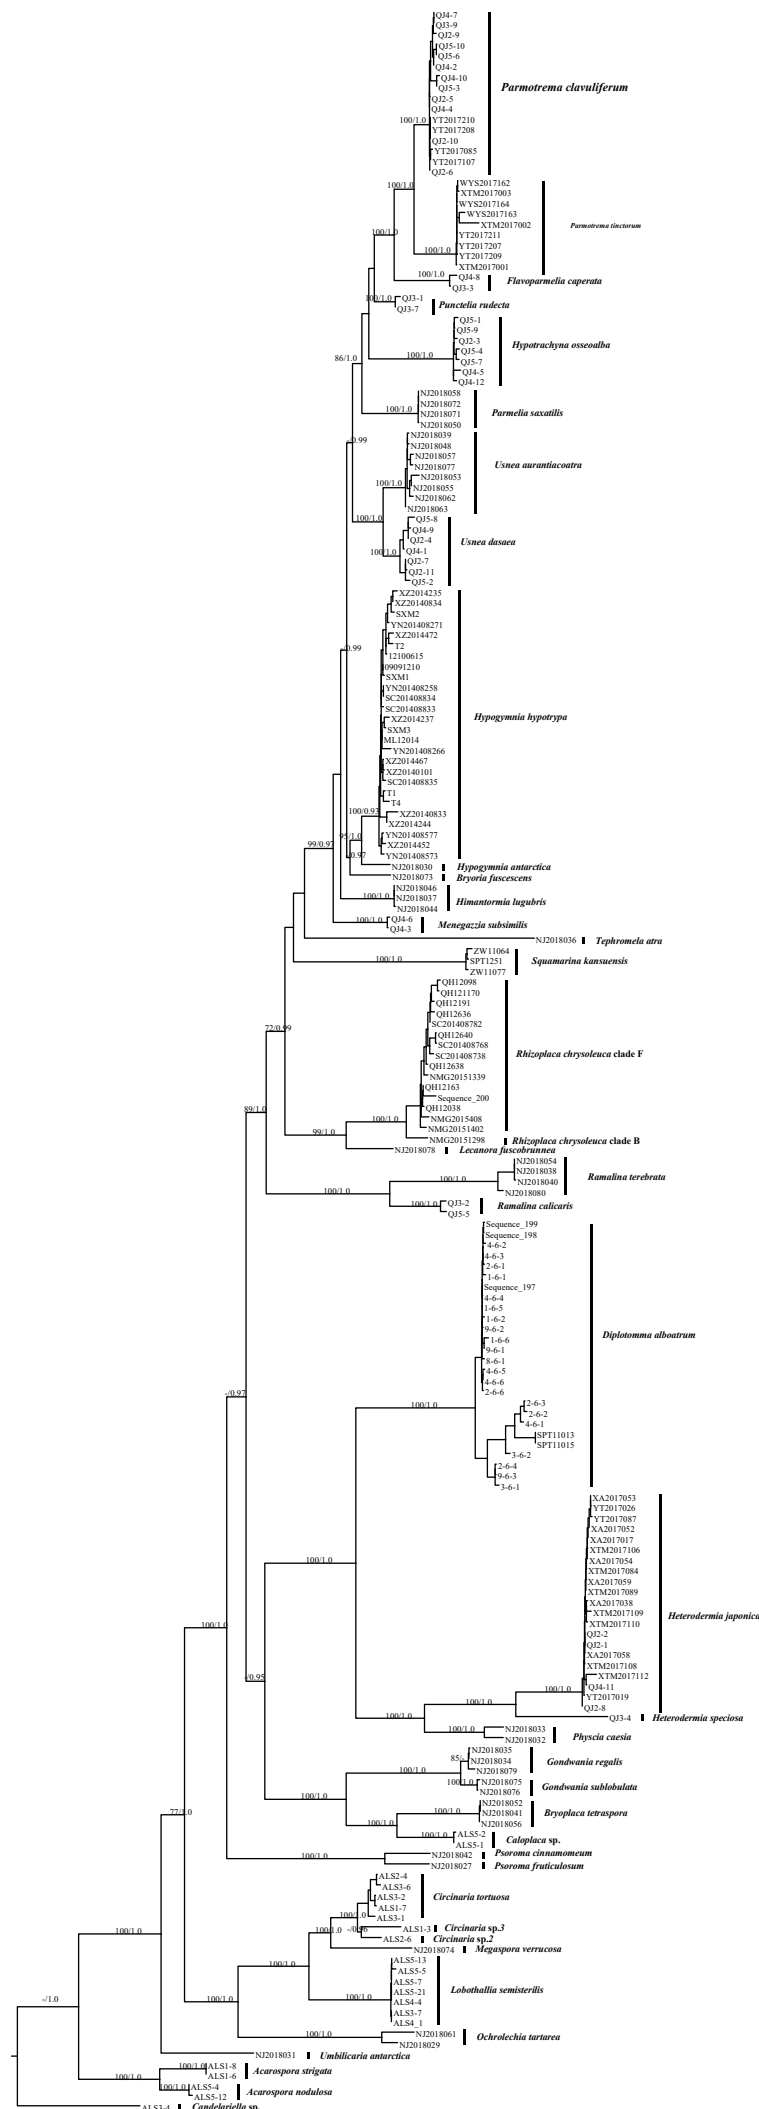

Figure S2. Phylogeny of lichen-forming fungi based on the Randomized Axelerated Maximum Likelihood analysis of the concatenated four-locus dataset including internal transcribed spacer region (ITS), the large nuclear subunit ribosomal RNA gene (nuLSU), the small mitochondrial subunit ribosomal RNA gene (mtSSU), and the largest subunit of RNA polymerase II (RPB1) sequences. The number in each node represents bootstrap support (BS) and posterior probability (PP). BS values of 70 and PP values of 0.95 were plotted on the branches. Scale in 0.02 substitution per site.
