# Supplementary material for: Fungal-Algal Association Drives Lichen Mutualistic Symbiosis: A Case Study With Trebouxia-Related Lichens
Source: Preprints.org preprint supplement (doi:10.20944/preprints202305.1720.v1), 2023-05-25
Supplement: Supplementary file 1 [file supplementary › Supplementary Materials/Figure S5.pdf]

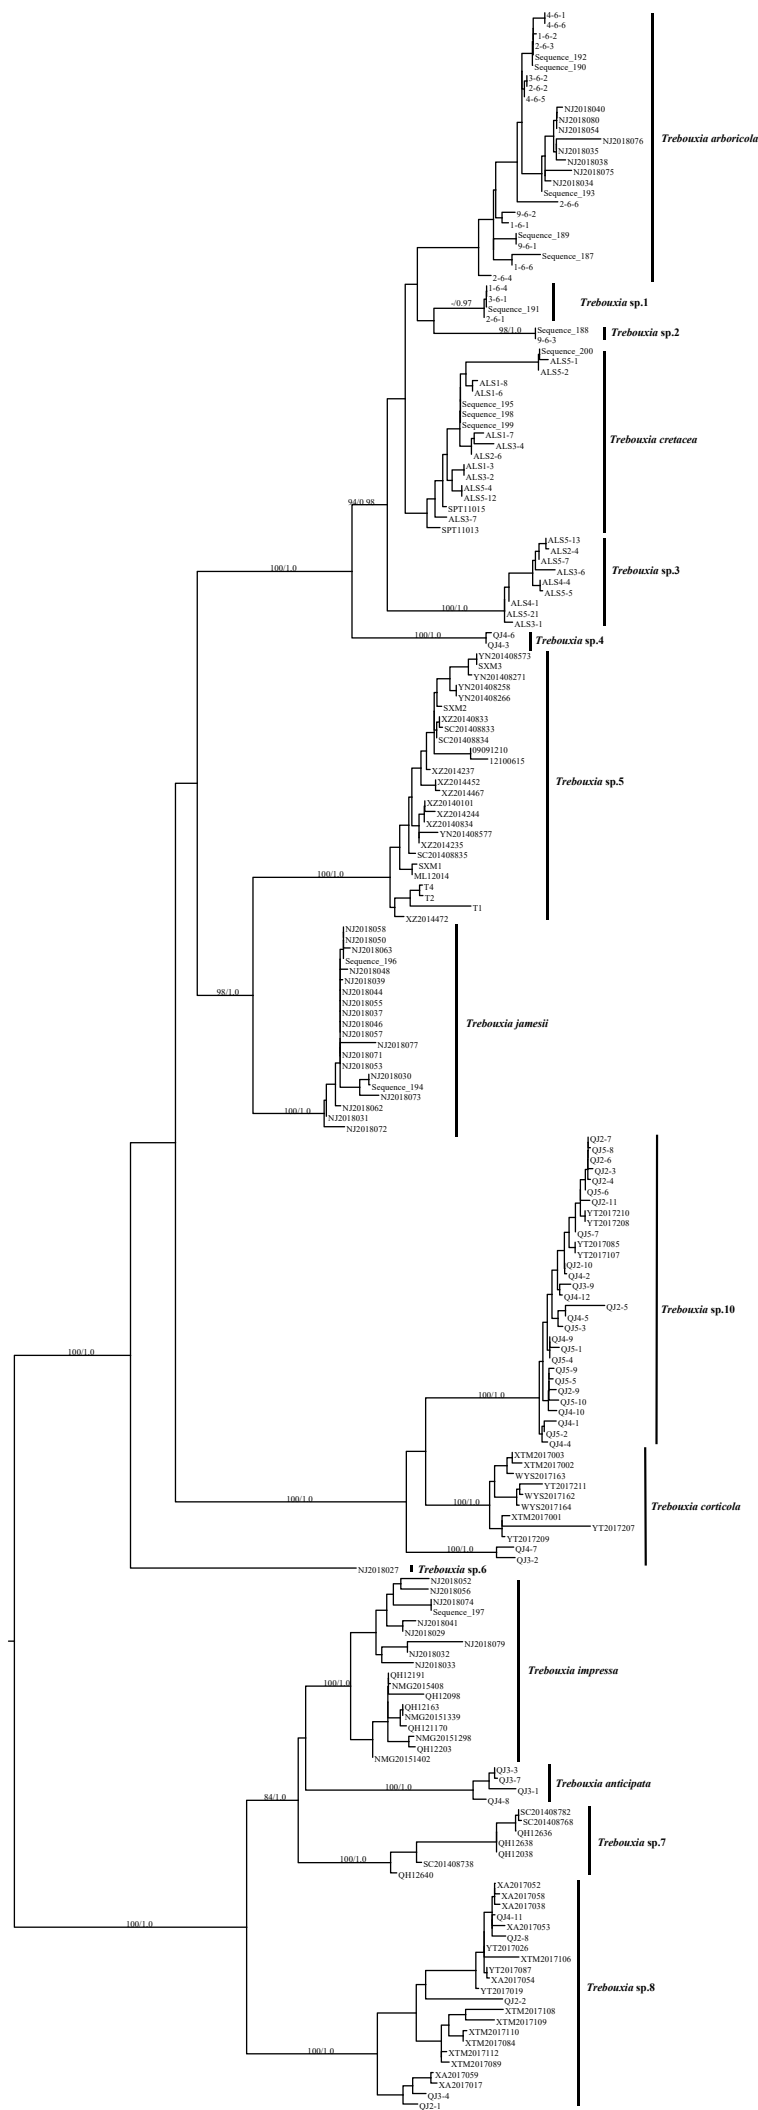

Figure S5. Phylogeny of lichen-forming algae *Trebouxia* species based on the Randomized Axelerated Maximum Likelihood (RAXML) analysis of a concatenated three-locus dataset including internal transcribed spacer region (ITS), the large nuclear subunit ribosomal RNA gene (nuSSU), and chloroplast ribulose-bisphosphate carboxylase-RuBisCO (rbcL) sequences. The number in each node represents bootstrap support (BS) and posterior probability (PP). BS values of  $\geq 70$  and PP values of  $\geq 0.95$  were plotted on the branches. Scale in 0.01 substitution per site.
