# Supplementary material for: Fungal-Algal Association Drives Lichen Mutualistic Symbiosis: A Case Study With Trebouxia-Related Lichens
Source: Preprints.org preprint supplement (doi:10.20944/preprints202305.1720.v1), 2023-05-25
Supplement: Supplementary file 1 [file supplementary › Supplementary Materials/Table S1.xlsx]

## Sheet: Sheet1
Table S1. Lichen samples used in this study, including voucher information and GenBank accession numbers.
Specimens No.	Coll.No.	Locality	GPS		Mycobiont					Photobiont
			longitude	latitude	Species name	ITS	LSU	mtSSU	RPB1	Species name	ITS	SSU	rbcL
1-6-1	1-6-1	Isreal,Sede Boger,Negev Desert,Station 1	34.7764	30.8736	Diplotomma alboatrum	OL331427	OL331708	OM103957	—	Trebouxia arboricola	OL331603	OL614494	OK668940
1-6-2	1-6-2	Isreal,Sede Boger,Negev Desert,Station 1	34.7764	30.8736	Diplotomma alboatrum	OL331428	OL331709	OM103963	OM643498	Trebouxia arboricola	OL331604	—	OK668944
1-6-4	1-6-4	Isreal,Sede Boger,Negev Desert,Station 1	34.7764	30.8736	Diplotomma alboatrum	—	OL331710	OM103964	—	Trebouxia sp.1	OL331624	OL614497	OK668959
1-6-5	1-6-5	Isreal,Sede Boger,Negev Desert,Station 1	34.7764	30.8736	Diplotomma alboatrum	OL331437	OL331711	OM103962	—	Trebouxia arboricola	—	OL614498	OK668966
1-6-6	1-6-6	Isreal,Sede Boger,Negev Desert,Station 2	34.7764	30.8736	Diplotomma alboatrum	OL331440	—	—	OM643499	Trebouxia arboricola	OL331621	OL614499	OK668986
2-6-1	2-6-1	Isreal,Sede Boger,Negev Desert,Station 2	34.7764	30.8737	Diplotomma alboatrum	OL331438	OL331712	OM103968	OM643500	Trebouxia sp.1	OL331626	OL614501	OK668942
2-6-2	2-6-2	Isreal,Sede Boger,Negev Desert,Station 2	34.7764	30.8737	Diplotomma alboatrum	OL331444	OL331713	OM103979	—	Trebouxia arboricola	OL331605	OL614519	OK668947
2-6-3	2-6-3	Isreal,Sede Boger,Negev Desert,Station 2	34.7764	30.8737	Diplotomma alboatrum	OL331447	OL331714	OM103978	OM643511	Trebouxia arboricola	OL331608	OL614528	OK668948
2-6-4	2-6-4	Isreal,Sede Boger,Negev Desert,Station 3	34.7764	30.8737	Diplotomma alboatrum	OL331441	OL331715	OM103969	OM643509	Trebouxia arboricola	OL331618	OL614531	OK668941
2-6-5	2-6-5	Isreal,Sede Boger,Negev Desert,Station 3	34.7764	30.8737	Diplotomma alboatrum	—	OL331716	OM103966	OM643501	Trebouxia sp.2	—	OL614535	OK668963
2-6-6	2-6-6	Isreal,Sede Boger,Negev Desert,Station 4	34.7764	30.8737	Diplotomma alboatrum	OL331433	OL331717	OM103972	—	Trebouxia arboricola	OL331623	OL614529	OK668950
3-6-1	3-6-1	Isreal,Sede Boger,Negev Desert,Station 4	34.7762	30.8738	Diplotomma alboatrum	OL331443	OL331718	OM103970	—	Trebouxia sp.1	OL331625	OL614517	OK668943
3-6-2	3-6-2	Isreal,Sede Boger,Negev Desert,Station 4	34.7762	30.8738	Diplotomma alboatrum	OL331446	OL331719	OM103973	OM643510	Trebouxia arboricola	OL331607	OL614513	OK668951
3-6-3	3-6-3	Isreal,Sede Boger,Negev Desert,Station 4	34.7762	30.8738	Diplotomma alboatrum	—	OL331720	OM103967	OM643502	Trebouxia arboricola	—	OL614520	OK668962
4-6-1	4-6-1	Isreal,Sede Boger,Negev Desert,Station 4	34.7766	30.8742	Diplotomma alboatrum	OL331445	OL331721	OM103980	—	Trebouxia arboricola	OL331610	OL614521	OK668946
4-6-2	4-6-2	Isreal,Sede Boger,Negev Desert,Station 8	34.7766	30.8742	Diplotomma alboatrum	OL331430	OL331722	OM103981	OM643508	Trebouxia arboricola	—	OL614526	OK668988
4-6-3	4-6-3	Isreal,Sede Boger,Negev Desert,Station 9	34.7766	30.8742	Diplotomma alboatrum	OL331431	OL331723	OM103958	—	Trebouxia sp.1	—	OL614514	OK668960
4-6-4	4-6-4	Isreal,Sede Boger,Negev Desert,Station 9	34.7766	30.8742	Diplotomma alboatrum	OL331432	OL331724	OM103959	OM643505	Trebouxia arboricola	—	—	OK668949
4-6-5	4-6-5	Isreal,Sede Boger,Negev Desert,Station 1	34.7766	30.8742	Diplotomma alboatrum	OL331439	OL331725	OM103974	—	Trebouxia arboricola	OL331606	OL614512	OK668957
4-6-6	4-6-6	Isreal,Sede Boger,Negev Desert,Station 2	34.7766	30.8742	Diplotomma alboatrum	OL331434	—	OM103975	OM643503	Trebouxia arboricola	OL331609	OL614534	OK668989
8-6-1	8-6-1	Isreal,Sede Boger,Negev Desert,Station 3	34.777	30.8751	Diplotomma alboatrum	OL331435	OL331726	OM103965	OM643504	Trebouxia arboricola	—	OL614495	OK668945
9-6-1	9-6-1	Isreal,Sede Boger,Negev Desert,Station 4	34.7769	30.8753	Diplotomma alboatrum	OL331436	OL331727	OM103960	OM643506	Trebouxia arboricola	OL331622	OL614527	OK668965
9-6-2	9-6-2	Isreal,Sede Boger,Negev Desert,Station 2	34.7769	30.8753	Diplotomma alboatrum	OL331429	OL331728	OM103961	OM643507	Trebouxia arboricola	OL331620	OL614496	OK668961
9-6-3	9-6-3	Isreal,Sede Boger,Negev Desert,Station 9	34.7769	30.8753	Diplotomma alboatrum	OL331442	OL331729	OM103971	—	Trebouxia sp.2	OL331650	OL614507	OK668964
09091210	09091210	Japan	138.174	35.8828	Hypogymnia hypotrypa	KP076648	OL331706	OM103861	—	Trebouxia sp.5	OL331517	—	OK668854
12100615	12100615	Japan	138.187	35.8611	Hypogymnia hypotrypa	KP076649	OL331707	OM103853	—	Trebouxia sp.5	OL331518	—	OK668847
ALS1-3	ALS2018052	China, Inner Mongolia, Alxa Right Banner	101.109	39.5419	Circinaria sp3.	OL331482	OL331730	OM104006	—	Trebouxia cretacea	OL331627	—	OK668875
ALS1-6	ALS2018055	China, Inner Mongolia, Alxa Right Banner	101.109	39.5419	Acarospora strigata	OL331478	OL331731	OM104022	OM643485	Trebouxia cretacea	OL331635	OL614524	OK668878
ALS1-7	ALS2018056	China, Inner Mongolia, Alxa Right Banner	101.109	39.5419	Circinaria tortuosa	OL331483	OL331732	OM104007	OM439677	Trebouxia cretacea	OL331628	OL614530	OK668895
ALS1-8	ALS2018057	China, Inner Mongolia, Alxa Right Banner	101.109	39.5419	Acarospora strigata	OL331479	OL331733	OM104023	OM643486	Trebouxia cretacea	OL331636	OL614532	OK668890
ALS2-4	ALS2018061	China, Inner Mongolia, Alxa Right Banner	101.109	39.5419	Circinaria tortuosa	OL331486	OL331734	OM104009	OM439681	Trebouxia sp.3	OL331641	OL614515	OK668894
ALS2-6	ALS2018063	China, Inner Mongolia, Alxa Right Banner	101.109	39.5419	Circinaria sp2.	OL331488	OL331735	—	OM439682	Trebouxia cretacea	OL331631	OL614500	OK668887
ALS3-1	ALS2018069	China, Inner Mongolia, Alxa Right Banner	101.109	39.5419	Circinaria tortuosa	OL331485	OL331736	OM104010	OM439678	Trebouxia sp.3	OL331647	OL614594	OK668881
ALS3-2	ALS2018070	China, Inner Mongolia, Alxa Right Banner	101.109	39.5419	Circinaria tortuosa	OL331484	OL331737	OM104008	OM439679	Trebouxia cretacea	OL331629	OL614523	OK668885
ALS3-4	ALS2018072	China, Inner Mongolia, Alxa Right Banner	101.109	39.5419	Candelariella sp.	OL331477	OL331738	OM104026	—	Trebouxia cretacea	OL331638	OL614522	OK668877
ALS3-6	ALS2018074	China, Inner Mongolia, Alxa Right Banner	101.109	39.5419	Circinaria tortuosa	OL331487	OL331739	OM104011	OM439680	Trebouxia sp.3	OL331644	—	OK668891
ALS3-7	ALS2018075	China, Inner Mongolia, Alxa Right Banner	101.109	39.5419	Lobothallia semisterilis	OL331489	—	OM104012	—	Trebouxia cretacea	OL331630	—	OK668879
ALS4-1	ALS2018076	China, Inner Mongolia, Alxa Right Banner	101.109	39.5419	Lobothallia semisterilis	OL331492	OL331740	OM104013	OL782175	Trebouxia sp.3	OL331648	OL614516	OK668892
ALS4-4	ALS2018079	China, Inner Mongolia, Alxa Right Banner	101.109	39.5419	Lobothallia semisterilis	OL331495	OL331741	OM104017	—	Trebouxia sp.3	OL331645	OL614660	OK668889
ALS5-1	ALS2018086	China, Inner Mongolia, Alxa Right Banner	101.109	39.5419	Caloplaca sp.	OL331422	OL331742	OM103945	OM743244	Trebouxia cretacea	OL331639	OL614504	OK668886
ALS5-2	ALS2018087	China, Inner Mongolia, Alxa Right Banner	101.109	39.5419	Caloplaca sp.	OL331423	OL331745	OM103946	OM688031	Trebouxia cretacea	OL331640	OL614509	OK668884
ALS5-4	ALS2018089	China, Inner Mongolia, Alxa Right Banner	101.109	39.5419	Acarospora nodulosa	OL331481	OL331747	OM104025	OM643484	Trebouxia cretacea	OL331633	OL614502	OK668876
ALS5-5	ALS2018090	China, Inner Mongolia, Alxa Right Banner	101.109	39.5419	Lobothallia semisterilis	OL331491	OL331748	OM104015	OL782179	Trebouxia sp.3	OL331646	OL614661	OK668893
ALS5-7	ALS2018092	China, Inner Mongolia, Alxa Right Banner	101.109	39.5419	Lobothallia semisterilis	OL331493	OL331893	OM104016	OL782178	Trebouxia sp.3	OL331643	OL614662	OK668882
ALS5-12	ALS2018097	China, Inner Mongolia, Alxa Right Banner	101.109	39.5419	Acarospora nodulosa	OL331480	OL331743	OM104024	OM688030	Trebouxia cretacea	OL331632	OL614506	OK668880
ALS5-13	ALS2018098	China, Inner Mongolia, Alxa Right Banner	101.109	39.5419	Lobothallia semisterilis	OL331490	OL331744	OM104014	OL782176	Trebouxia sp.3	OL331642	OL614663	OK668888
ALS5-21	ALS2018106	China, Inner Mongolia, Alxa Right Banner	101.109	39.5419	Lobothallia semisterilis	OL331494	OL331746	OM104018	OL782177	Trebouxia sp.3	OL331649	OL614518	OK668883
ML12014	ML12014	China,Yunnan Province, Deqin County	98.6537	23.64	Hypogymnia hypotrypa	OL331322	OL331749	OM103856	—	Trebouxia sp.5	OL331519	—	OK668861
NJ2018027	NJ2018027	China, Antarctic Great Wall Station	-58.9569	-62.2188	Psoroma fruticulosum	OL331497	OL331750	OM103955	OM584299	Trebouxia sp.6	OL331602	OL614655	OK668987
NJ2018029	NJ2018029	China, Antarctic Great Wall Station	-58.9569	-62.2188	Ochrolechia tartarea	OL331474	OL331751	OM104020	OM743245	Trebouxia impressa	OL331653	OL614610	OK668993
NJ2018030	NJ2018030	China, Antarctic Great Wall Station	-58.9569	-62.2188	Hypogymnia antarctica	OL331332	—	OM103879	OM687984	Trebouxia jamesii	OL331596	OL614544	OK668862
NJ2018031	NJ2018031	China, Antarctic Great Wall Station	-58.9569	-62.2188	Umbilicaria antarctica	OL331476	OL331752	OM104019	OM439676	Trebouxia jamesii	OL331595	OL614538
NJ2018032	NJ2018032	China, Antarctic Great Wall Station	-58.9569	-62.2188	Physcia caesia	OL331450	OL331753	OM103982	—	Trebouxia impressa	OL331657	OL614646	OK668996
NJ2018033	NJ2018033	China, Antarctic Great Wall Station	-58.9569	-62.2188	Physcia dubia	OL331451	OL331754	OM103983	—	Trebouxia impressa	OL331660	OL614647	OK668997
NJ2018034	NJ2018034	China, Antarctic Great Wall Station	-58.9569	-62.2188	Gondwania regalis	OL331419	OL331755	OM103950	OM688032	Trebouxia arboricola	OL331611	—	OK668954
NJ2018035	NJ2018035	China, Antarctic Great Wall Station	-58.9569	-62.2188	Gondwania regalis	OL331420	OL331756	OM103951	OM688033	Trebouxia arboricola	OL331616	—	OK668952
NJ2018036	NJ2018036	China, Antarctic Great Wall Station	-58.9569	-62.2188	Tephromela atra	OL331416	—	OM103924	OM687983	Trebouxia jamesii	—	OL614563	OK668863
NJ2018037	NJ2018037	China, Antarctic Great Wall Station	-58.9569	-62.2188	Himantormia lugubris	OL331334	OL331757	OM103888	OM687997	Trebouxia jamesii	OL331597	OL614536	OK668983
NJ2018038	NJ2018038	China, Antarctic Great Wall Station	-58.9569	-62.2188	Ramalina terebrata	OL331410	OL331758	—	OM687993	Trebouxia arboricola	OL331619	—	OK668953
NJ2018039	NJ2018039	China, Antarctic Great Wall Station	-58.9569	-62.2188	Usnea aurantiacoatra	OL331366	OL331759	—	OM643487	Trebouxia jamesii	OL331587	OL614546	OK668984
NJ2018040	NJ2018040	China, Antarctic Great Wall Station	-58.9569	-62.2188	Ramalina terebrata	OL331411	OL331760	—	OM687994	Trebouxia arboricola	OL331612	—	OK668956
NJ2018041	NJ2018041	China, Antarctic Great Wall Station	-58.9569	-62.2188	Bryoplaca tetraspora	OL331424	OL331761	OM103947	OM643482	Trebouxia impressa	OL331654	OL614613	OK668995
NJ2018042	NJ2018042	China, Antarctic Great Wall Station	-58.9569	-62.2188	Psoroma cinnamomeum	OL331498	OL331762	OM103956	OM584300	Trebouxia cretacea	—	OL614505	—
NJ2018044	NJ2018044	China, Antarctic Great Wall Station	-58.9569	-62.2188	Himantormia lugubris	OL331335	OL331763	OM103890	OM687998	Trebouxia jamesii	OL331592	OL614541	OK668973
NJ2018046	NJ2018046	China, Antarctic Great Wall Station	-58.9569	-62.2188	Himantormia lugubris	OL331336	OL331764	OM103889	OM687999	Trebouxia jamesii	OL331593	OL614539	OK668977
NJ2018048	NJ2018048	China, Antarctic Great Wall Station	-58.9569	-62.2188	Usnea aurantiacoatra	OL331372	OL331765	—	OM643488	Trebouxia jamesii	OL331598	OL614657	OK668974
NJ2018050	NJ2018050	China, Antarctic Great Wall Station	-58.9569	-62.2188	Parmelia saxatilis	OL331381	OL331766	OM103881	OM688002	Trebouxia jamesii	OL331594	OL614548	OK668979
NJ2018052	NJ2018052	China, Antarctic Great Wall Station	-58.9569	-62.2188	Bryoplaca tetraspora	OL331426	OL331767	OM103949		Trebouxia impressa	OL331656	OL614611	OK668932
NJ2018053	NJ2018053	China, Antarctic Great Wall Station	-58.9569	-62.2188	Usnea aurantiacoatra	OL331373	OL331768	—	OM643490	Trebouxia jamesii	OL331585	OL614549	OK668970
NJ2018054	NJ2018054	China, Antarctic Great Wall Station	-58.9569	-62.2188	Ramalina terebrata	OL331412	OL331769	OM104027	OM687995	Trebouxia arboricola	OL331614	—	OK668955
NJ2018055	NJ2018055	China, Antarctic Great Wall Station	-58.9569	-62.2188	Usnea aurantiacoatra	OL331371	OL331770	—	OM643491	Trebouxia jamesii	OL331590	OL614540	OK668985
NJ2018056	NJ2018056	China, Antarctic Great Wall Station	-58.9569	-62.2188	Bryoplaca tetraspora	OL331425	OL331771	OM103948	—	Trebouxia impressa	OL331655	OL614612	OK668994
NJ2018057	NJ2018057	China, Antarctic Great Wall Station	-58.9569	-62.2188	Usnea aurantiacoatra	OL331367	OL331772	—	—	Trebouxia jamesii	OL331588	OL614537	OK668978
NJ2018058	NJ2018058	China, Antarctic Great Wall Station	-58.9569	-62.2188	Parmelia saxatilis	OL331382	OL331773	OM103882	OM688003	Trebouxia jamesii	OL331586	OL614550	OK668976
NJ2018061	NJ2018061	China, Antarctic Great Wall Station	-58.9569	-62.2188	Ochrolechia tartarea	OL331475	OL331774	OM104021	—	Trebouxia jamesii	—	OL614592	OK668980
NJ2018062	NJ2018062	China, Antarctic Great Wall Station	-58.9569	-62.2188	Usnea aurantiacoatra	OL331370	OL331775	—	OM643492	Trebouxia jamesii	OL331589	OL614658	OK668975
NJ2018063	NJ2018063	China, Antarctic Great Wall Station	-58.9569	-62.2188	Usnea aurantiacoatra	OL331368	OL331776	—	OM643489	Trebouxia jamesii	OL331591	OL614543	OK668981
NJ2018071	NJ2018071	China, Antarctic Great Wall Station	-58.9587	-62.2199	Parmelia saxatilis	OL331383	—	—	—	Trebouxia jamesii	OL331599	OL614542	OK668972
NJ2018072	NJ2018072	China, Antarctic Great Wall Station	-58.9587	-62.2199	Parmelia saxatilis	OL331384	OL331777	OM103883	OM688004	Trebouxia jamesii	OL331600	OL614593	OK668982
NJ2018073	NJ2018073	China, Antarctic Great Wall Station	-58.9587	-62.2199	Bryoria fuscescens	OL331333	OL331778	OM103880	OM688005	Trebouxia jamesii	OL331584	OL614547	OK668864
NJ2018074	NJ2018074	China, Antarctic Great Wall Station	-58.9587	-62.2199	Megaspora verrucosa	OL331496	OL331779	—	OM687982	Trebouxia impressa	OL331659	OL614652	OK668998
NJ2018075	NJ2018075	China, Antarctic Great Wall Station	-58.9587	-62.2199	Gondwania sublobulata	OL331417	OL331780	OM103953	OM688036	Trebouxia arboricola	OL331615	—	OK668969
NJ2018076	NJ2018076	China, Antarctic Great Wall Station	-58.9587	-62.2199	Gondwania sublobulata	OL331418	OL331781	OM103954	OM688035	Trebouxia arboricola	OL331617	—	OK668896
NJ2018077	NJ2018077	China, Antarctic Great Wall Station	-58.9587	-62.2199	Usnea aurantiacoatra	OL331369	OL331782	—	OM643493	Trebouxia jamesii	OL331601	OL614545	OK668971
NJ2018078	NJ2018078	China, Antarctic Great Wall Station	-58.9587	-62.2199	Lecanora fuscobrunnea	OL331409	OL331783	OM103928	OM688043	Trebouxia impressa	—	OL614653	OK669006
NJ2018079	NJ2018079	China, Antarctic Great Wall Station	-58.9587	-62.2199	Gondwania regalis	OL331421	OL331784	OM103952	OM688034	Trebouxia impressa	OL331658	OL614656	OK669031
NJ2018080	NJ2018080	China, Antarctic Great Wall Station	-58.9587	-62.2199	Ramalina terebrata	OL331413	OL331785	OM104028	OM687996	Trebouxia arboricola	OL331613	—	—
NMG20151298	NMG20151298	China, Inner Mongolia, Chifeng City	118.695	44.2281	Rhizoplaca chrysoleuca clade B	OL331408	OL331786	OM103929	OM688042	Trebouxia impressa	OL331661	OL614614	OK668934
NMG20151339	NMG20151339	China, Inner Mongolia, Chifeng City	118.695	44.2281	Rhizoplaca chrysoleuca clade F	OL331394	OL331787	OM103932	OM688039	Trebouxia impressa	OL331669	OL614634	OK669000
NMG20151402	NMG20151402	China, Inner Mongolia, Chifeng City	118.695	44.2281	Rhizoplaca chrysoleuca clade F	OL331404	OL331788	OM103943	OM688038	Trebouxia impressa	OL331662	OL614615	OK668999
NMG2015408	NMG2015408	China, Inner Mongolia, Ergun City	120.057	51.0567	Rhizoplaca chrysoleuca clade F	OL331407	OL331789	OM103938	OM688037	Trebouxia impressa	OL331663	OL614616	OK669001
QH12038	QH12038	China, Qinghai Province	99.8667	34.4667	Rhizoplaca chrysoleuca clade F	OL331405	OL331790	OM103933	OM687991	Trebouxia sp.7	OL331670	—	—
QH12098	QH12098	China, Qinghai Province	99.8667	34.4667	Rhizoplaca chrysoleuca clade F	OL331395	—	OM103939	OM687985	Trebouxia impressa	OL331664	OL614654	—
QH121170	QH121170	China, Qinghai Province	96.4	33.2667	Rhizoplaca chrysoleuca clade F	OL331403	OL331791	OM103934	OM687990	Trebouxia impressa	OL331665	OL614617	OK669002
QH12163	QH12163	China, Qinghai Province	99.8667	34.4667	Rhizoplaca chrysoleuca clade F	OL331406	—	OM103940	—	Trebouxia impressa	OL331667	OL614635	—
QH12191	QH12191	China, Qinghai Province	99.8667	34.4667	Rhizoplaca chrysoleuca clade F	OL331396	OL331792	OM103941	OM687987	Trebouxia impressa	OL331668	—	—
QH12203	QH12203	China, Qinghai Province	99.8667	34.4667	Rhizoplaca chrysoleuca clade F	—	OL331793	OM103937	OM688029	Trebouxia impressa	OL331666	OL614618	OK668933
QH12636	QH12636	China, Qinghai Province	96.4	33.2667	Rhizoplaca chrysoleuca clade F	OL331397	OL331794	OM103935	OM687992	Trebouxia sp.7	OL331672	OL614637	OK669007
QH12638	QH12638	China, Qinghai Province	96.4	33.2667	Rhizoplaca chrysoleuca clade F	OL331398	OL331795	OM103942	OM687986	Trebouxia sp.7	OL331671	OL614638	OK669008
QH12640	QH12640	China, Qinghai Province	96.4	33.2667	Rhizoplaca chrysoleuca clade F	OL331399	OL331796	OM103930	OM688041	Trebouxia sp.7	OL331673	OL614639	OK668937
QJ2-1	QJ2018001	China, Yunnan Province, Qujing County	104.417	25.3667	Heterodermia japonica	OL331470	OL331797	OM103984	OM584301	Trebouxia sp.8	OL331683	OL614648	OK669010
QJ2-2	QJ2018002	China, Yunnan Province, Qujing County	104.417	25.3667	Heterodermia japonica	OL331469	OL331800	OM103987	OM743246	Trebouxia sp.8	OL331698	OL614651	OK669011
QJ2-3	QJ2018003	China, Yunnan Province, Qujing County	104.417	25.3667	Hypotrachyna osseoalba	OL331387	OL331801	OM103917	OM643475	Trebouxia sp.10	OL331570	OL614582	OK668904
QJ2-4	QJ2018004	China, Yunnan Province, Qujing County	104.417	25.3667	Usnea dasaea	OL331374	OL331802	—	—	Trebouxia sp.10	OL331551	OL614569	OK668902
QJ2-5	QJ2018005	China, Yunnan Province, Qujing County	104.417	25.3667	Parmotrema clavuliferum	OL331359	OL331803	OM103905	OM688006	Trebouxia sp.10	OL331567	OL614571	OK668924
QJ2-6	QJ2018006	China, Yunnan Province, Qujing County	104.417	25.3667	Parmotrema clavuliferum	OL331352	OL331804	OM103893	OM688016	Trebouxia sp.10	OL331561	OL614567	OK668903
QJ2-7	QJ2018007	China, Yunnan Province, Qujing County	104.417	25.3667	Usnea dasaea	OL331379	OL331805	—	OM643495	Trebouxia sp.10	OL331559	OL614568	—
QJ2-8	QJ2018008	China, Yunnan Province, Qujing County	104.417	25.3667	Heterodermia japonica	OL331468	OL331806	OM103985	OM584318	Trebouxia sp.8	OL331687	OL614644	OK669024
QJ2-9	QJ2018009	China, Yunnan Province, Qujing County	104.417	25.3667	Parmotrema clavuliferum	OL331363	OL331807	OM103892	OM688009	Trebouxia sp.10	OL331568	OL614586	OK668923
QJ2-10	QJ2018010	China, Yunnan Province, Qujing County	103.85	24.82	Parmotrema clavuliferum	OL331358	OL331798	OM103891	—	Trebouxia sp.10	OL331549	OL614565	OK668897
QJ2-11	QJ2018011	China, Yunnan Province, Qujing County	104.417	25.3667	Usnea dasaea	OL331378	OL331799	—	OM643494	Trebouxia sp.10	OL331550	OL614566	OK668898
QJ3-1	QJ2018013	China, Yunnan Province, Qujing County	103.85	24.82	Punctelia rudecta	OL331337	OL331808	OM103886	—	Trebouxia anticipata	OL331699	—	OK668939
QJ3-2	QJ2018014	China, Yunnan Province, Qujing County	103.85	24.82	Ramalina calicaris	OL331414	—	OM103926	—	Trebouxia sp.9	OL331543	OL614595	OK668931
QJ3-3	QJ2018015	China, Yunnan Province, Qujing County	103.85	24.82	Flavoparmelia caperata	OL331385	OL331809	OM103915	—	Trebouxia anticipata	OL331700	—	OK668935
QJ3-4	QJ2018016	China, Yunnan Province, Qujing County	103.85	24.82	Heterodermia speciosa	OL331473	OL331810	OM104005	—	Trebouxia sp.8	OL331684	OL614649	OK668938
QJ3-7	QJ2018019	China, Yunnan Province, Qujing County	103.85	24.82	Punctelia rudecta	OL331338	OL331811	OM103887	—	Trebouxia anticipata	OL331701	—	OK668936
QJ3-9	QJ2018021	China, Yunnan Province, Qujing County	103.85	24.82	Parmotrema clavuliferum	OL331353	OL331812	OM103894	—	Trebouxia sp.10	OL331571	—	OK668920
QJ4-1	QJ2018023	China, Yunnan Province, Qujing County	103.86	24.82	Usnea dasaea	OL331377	OL331813	—	—	Trebouxia sp.10	OL331572	OL614572	OK668916
QJ4-2	QJ2018024	China, Yunnan Province, Qujing County	103.86	24.82	Parmotrema clavuliferum	OL331362	OL331817	OM103895	OM688007	Trebouxia sp.10	OL331552	OL614579	OK668911
QJ4-3	QJ2018025	China, Yunnan Province, Qujing County	103.86	24.82	Menegazzia subsimilis	OL331364	OL331818	OM103884	OM688000	Trebouxia sp.4	OL331651	OL614580	OK668967
QJ4-4	QJ2018026	China, Yunnan Province, Qujing County	103.86	24.82	Parmotrema clavuliferum	OL331357	OL331819	OM103899	OM688013	Trebouxia sp.10	OL331562	OL614575	OK668915
QJ4-5	QJ2018027	China, Yunnan Province, Qujing County	103.86	24.82	Hypotrachyna osseoalba	OL331393	OL331820	OM103921	OM643477	Trebouxia sp.10	OL331560	OL614588	OK668913
QJ4-6	QJ2018028	China, Yunnan Province, Qujing County	103.86	24.82	Menegazzia subsimilis	OL331365	OL331821	OM103885	OM688001	Trebouxia sp.4	OL331652	OL614533	OK668968
QJ4-7	QJ2018029	China, Yunnan Province, Qujing County	103.86	24.82	Parmotrema clavuliferum	OL331354	OL331822	OM103896	OM688008	Trebouxia sp.9	OL331544	OL614574	OK668990
QJ4-8	QJ2018030	China, Yunnan Province, Qujing County	103.86	24.82	Flavoparmelia caperata	OL331386	OL331823	OM103916	OM688028	Trebouxia anticipata	OL331702	OL614650	OK669003
QJ4-9	QJ2018031	China, Yunnan Province, Qujing County	103.86	24.82	Usnea dasaea	OL331375	OL331824	—	OM643496	Trebouxia sp.10	OL331554	OL614585	OK668917
QJ4-10	QJ2018032	China, Yunnan Province, Qujing County	103.86	24.82	Parmotrema clavuliferum	OL331361	OL331814	OM103898	OM688018	Trebouxia sp.10	OL331569	OL614587	OK668910
QJ4-11	QJ2018033	China, Yunnan Province, Qujing County	103.86	24.82	Heterodermia japonica	OL331471	OL331815	OM104000	OM584302	Trebouxia sp.8	OL331688	OL614645	OK669014
QJ4-12	QJ2018034	China, Yunnan Province, Qujing County	103.86	24.82	Hypotrachyna osseoalba	OL331391	OL331816	OM103919	OM643476	Trebouxia sp.10	OL331553	OL614583	OK668912
QJ5-1	QJ2018036	China, Yunnan Province, Qujing County	103.85	24.82	Hypotrachyna osseoalba	OL331388	OL331825	OM103923	OM643480	Trebouxia sp.10	OL331573	OL614591	OK668918
QJ5-2	QJ2018037	China, Yunnan Province, Qujing County	103.85	24.82	Usnea dasaea	OL331380	OL331827	—	—	Trebouxia sp.10	OL331555	OL614570	OK668914
QJ5-3	QJ2018038	China, Yunnan Province, Qujing County	103.85	24.82	Parmotrema clavuliferum	OL331356	OL331828	OM103906	—	Trebouxia sp.10	OL331556	OL614573	OK668921
QJ5-4	QJ2018039	China, Yunnan Province, Qujing County	103.85	24.82	Hypotrachyna osseoalba	OL331389	OL331829	OM103922	OM643478	Trebouxia sp.10	OL331563	OL614584	OK668919
QJ5-5	QJ2018040	China, Yunnan Province, Qujing County	103.85	24.82	Ramalina calicaris	OL331415	—	OM103927	OM688044	Trebouxia sp.10	OL331565	OL614576	OK668905
QJ5-6	QJ2018041	China, Yunnan Province, Qujing County	103.85	24.82	Parmotrema clavuliferum	OL331355	OL331830	OM103897	OM688011	Trebouxia sp.10	OL331566	OL614577	OK668908
QJ5-7	QJ2018042	China, Yunnan Province, Qujing County	103.85	24.82	Hypotrachyna osseoalba	OL331390	OL331831	OM103918	OM643481	Trebouxia sp.10	OL331557	OL614590	OK668909
QJ5-8	QJ2018043	China, Yunnan Province, Qujing County	103.85	24.82	Usnea dasaea	OL331376	OL331832	—	OM643497	Trebouxia sp.10	OL331558	OL614578	OK668900
QJ5-9	QJ2018044	China, Yunnan Province, Qujing County	103.85	24.82	Hypotrachyna osseoalba	OL331392	OL331833	OM103920	OM643479	Trebouxia sp.10	OL331564	OL614589	OK668906
QJ5-10	QJ2018045	China, Yunnan Province, Qujing County	103.85	24.82	Parmotrema clavuliferum	OL331360	OL331826	OM103904	OM688010	Trebouxia sp.10	OL331574	OL614581	OK668907
SC201408738	SC201408738	China, Sichuan Province, Daocheng County	100.09	29.1898	Rhizoplaca chrysoleuca clade F	OL331400	OL331834	OM103944	OM687989	Trebouxia sp.7	OL331676	OL614640	OK669004
SC201408768	SC201408768	China, Sichuan Province, Daocheng County	100.09	29.1905	Rhizoplaca chrysoleuca clade F	OL331401	OL331835	OM103931	OM688040	Trebouxia sp.7	OL331674	OL614641	OK669009
SC201408782	SC201408782	China, Sichuan Province, Daocheng County	100.09	29.1905	Rhizoplaca chrysoleuca clade F	OL331402	OL331836	OM103936	OM687988	Trebouxia sp.7	OL331675	OL614642	OK669005
SC201408833	SC201408833	China, Sichuan Province, Yajiang County	100.7	30.1167	Hypogymnia hypotrypa	KP178759	OL331837	OM103863	—	Trebouxia sp.5	OL331521	—	OK668869
SC201408834	SC201408834	China, Sichuan Province, Yajiang County	100.7	30.1167	Hypogymnia hypotrypa	KP178757	OL331838	OM103874	—	Trebouxia sp.5	OL331522	OL614551	OK668855
SC201408835	SC201408835	China, Sichuan Province, Yajiang County	100.7	30.1167	Hypogymnia hypotrypa	KP178758	OL331839	OM103865	—	Trebouxia sp.5	OL331523	OL614556	OK668849
SPT11013	SPT11013	China, Ningxia Hui Hui Autonomous Region	104.584	37.4142	Diplotomma alboatrum	OL331448	—	OM103976	—	Trebouxia cretacea	OL331634	OL614503	OK668958
SPT11015	SPT11015	China, Ningxia Hui Hui Autonomous Region	104.584	37.4142	Diplotomma alboatrum	OL331449	—	OM103977	—	Trebouxia cretacea	OL331637	OL614508	—
SPT1251	SPT1251	China, Ningxia Hui Hui Autonomous Region	104.584	37.4142	Squamarina kansuensis	OL331501	OL331840	—	—	Trebouxia cretacea	—	OL614525	—
SXM1	SXM1	China, Shaanxi Province, Mt.Taibai	107.781	33.9156	Hypogymnia hypotrypa	OL331323	OL331841	OM103857	—	Trebouxia sp.5	OL331520	OL614557	OK668860
SXM2	SXM2	China, Shaanxi Province, Mt.Taibai	107.728	34.01	Hypogymnia hypotrypa	OL331324	OL331842	OM103869	—	Trebouxia sp.5	OL331528	OL614552	OK668856
SXM3	SXM3	China, Shaanxi Province, Mt.Taibai	107.768	33.9443	Hypogymnia hypotrypa	OL331325	OL331843	OM103858	—	Trebouxia sp.5	OL331529	OL614553	OK668874
T1	T1	China, Taiwan Province, Nantou County	121.17	24.08	Hypogymnia hypotrypa	OL331329	OL331844	OM103859	—	Trebouxia sp.5	OL331539	OL614659	OK668858
T2	T2	China, Taiwan Province, Nantou County	121.17	24.08	Hypogymnia hypotrypa	OL331330	OL331845	OM103860	—	Trebouxia sp.5	OL331541	OL614609	OK668853
T4	T4	China, Taiwan Province, Nantou County	121.17	24.08	Hypogymnia hypotrypa	OL331331	OL331846	OM103868	—	Trebouxia sp.5	OL331542	OL614564	OK668851
WYS2017162	WYS2017162	China, Fujian Province, Mt. Wuyi	117.773	27.6992	Parmotrema tinctorum	OL331339	OL331847	OM103907	OM688019	Trebouxia corticola	OL331575	OL614596	OK668925
WYS2017163	WYS2017163	China, Fujian Province, Mt. Wuyi	117.773	27.6992	Parmotrema tinctorum	OL331340	OL331848	OM103909	OM688026	Trebouxia corticola	OL331578	OL614597	OK668926
WYS2017164	WYS2017164	China, Fujian Province, Mt. Wuyi	117.773	27.6992	Parmotrema tinctorum	OL331341	OL331849	OM103912	OM688021	Trebouxia corticola	OL331576	OL614606	OK668927
XA2017017	XA2017017	China, Guangxi Province, Mt. Mao'er	110.434	25.8836	Heterodermia japonica	OL331465	OL331850	OM104003	OM584315	Trebouxia sp.8	OL331685	OL614619	OK669025
XA2017038	XA2017038	China, Guangxi Province, Mt. Mao'er	110.434	25.8836	Heterodermia japonica	OL331460	OL331851	OM104001	OM584313	Trebouxia sp.8	OL331689	OL614643	OK669012
XA2017052	XA2017052	China, Guangxi Province, Mt. Mao'er	110.434	25.8836	Heterodermia japonica	OL331466	OL331852	OM103986	OM584307	Trebouxia sp.8	OL331690	OL614626	OK669022
XA2017053	XA2017053	China, Guangxi Province, Mt. Mao'er	110.434	25.8836	Heterodermia japonica	OL331462	OL331853	OM103992	OM584308	Trebouxia sp.8	OL331691	OL614629	OK669020
XA2017054	XA2017054	China, Guangxi Province, Mt. Mao'er	110.413	25.88	Heterodermia japonica	OL331467	OL331854	OM103995	OM584314	Trebouxia sp.8	OL331694	OL614631	OK669013
XA2017058	XA2017058	China, Guangxi Province, Mt. Mao'er	110.413	25.88	Heterodermia japonica	OL331452	OL331855	OM103989	OM584316	Trebouxia sp.8	OL331695	OL614628	OK669015
XA2017059	XA2017059	China, Guangxi Province, Mt. Mao'er	110.413	25.88	Heterodermia japonica	OL331453	OL331856	OM103998	OM584303	Trebouxia sp.8	OL331686	OL614624	OK669019
XTM2017001	XTM2017001	China, Zhejiang Province, Mt. Tianmu	119.442	30.3183	Parmotrema tinctorum	OL331342	OL331857	OM103908	OM688024	Trebouxia corticola	OL331582	OL614600	OK668991
XTM2017002	XTM2017002	China, Zhejiang Province, Mt. Tianmu	119.442	30.3183	Parmotrema tinctorum	OL331343	OL331858	OM103914	OM688027	Trebouxia corticola	OL331579	OL614601	OK668930
XTM2017003	XTM2017003	China, Zhejiang Province, Mt. Tianmu	119.442	30.3183	Parmotrema tinctorum	OL331344	OL331859	OM103913	OM688025	Trebouxia corticola	OL331580	OL614598	OK668929
XTM2017084	XTM2017084	China, Zhejiang Province, Mt. Tianmu	119.431	30.3472	Heterodermia japonica	OL331454	OL331860	OM103991	OM584306	Trebouxia sp.8	OL331677	OL614620	OK669029
XTM2017089	XTM2017089	China, Zhejiang Province, Mt. Tianmu	119.436	30.3361	Heterodermia japonica	OL331455	OL331861	OM103997	OM584304	Trebouxia sp.8	OL331678	OL614625	OK669016
XTM2017106	XTM2017106	China, Zhejiang Province, Mt. Tianmu	119.436	30.3361	Heterodermia japonica	OL331461	OL331862	OM103996	OM584319	Trebouxia sp.8	OL331696	OL614627	OK669030
XTM2017108	XTM2017108	China, Zhejiang Province, Mt. Tianmu	119.436	30.3361	Heterodermia japonica	OL331456	OL331863	OM103988	OM584309	Trebouxia sp.8	OL331679	OL614621	OK669027
XTM2017109	XTM2017109	China, Zhejiang Province, Mt. Tianmu	119.436	30.3361	Heterodermia japonica	OL331457	OL331864	OM104002	OM584305	Trebouxia sp.8	OL331680	OL614636	OK669028
XTM2017110	XTM2017110	China, Zhejiang Province, Mt. Tianmu	119.436	30.3361	Heterodermia japonica	OL331459	OL331865	OM104004	OM584310	Trebouxia sp.8	OL331681	OL614622	OK669026
XTM2017112	XTM2017112	China, Zhejiang Province, Mt. Tianmu	119.436	30.3361	Heterodermia japonica	OL331472	OL331866	OM103994	OM584312	Trebouxia sp.8	OL331682	OL614623	OK669018
XZ20140101	XZ20140101	China, Tibet, Linzhi District, Milin County	94.7152	29.6519	Hypogymnia hypotrypa	OL331326	OL331867	OM103875	—	Trebouxia sp.5	OL331524	—	OK668848
XZ20140833	XZ20140833	China, Tibet, Linzhi District, Milin County	97.4642	28.66	Hypogymnia hypotrypa	OL331327	OL331868	OM103876	—	Trebouxia sp.5	OL331525	—	OK668870
XZ20140834	XZ20140834	China, Tibet, Linzhi District, Milin County	97.4642	28.66	Hypogymnia hypotrypa	OL331328	OL331869	OM103866	—	Trebouxia sp.5	OL331526	—	OK668865
XZ2014235	XZ2014235	China, Tibet, Linzhi District, Milin County	94.7388	29.7638	Hypogymnia hypotrypa	KP178755	OL331870	OM103870	—	Trebouxia sp.5	OL331537	OL614559	OK668866
XZ2014237	XZ2014237	China, Tibet, Linzhi District, Milin County	94.7388	29.7638	Hypogymnia hypotrypa	KP178754	OL331871	OM103867	—	Trebouxia sp.5	OL331538	OL614558	OK668871
XZ2014244	XZ2014244	China, Tibet, Linzhi District, Milin County	94.7388	29.7638	Hypogymnia hypotrypa	KP178756	OL331872	OM103877	—	Trebouxia sp.5	OL331527	OL614554	OK668859
XZ2014452	XZ2014452	China, Tibet, Linzhi District, Motuo County	95.1973	30.0588	Hypogymnia hypotrypa	KP178751	OL331873	OM103872	—	Trebouxia sp.5	OL331532	—	OK668857
XZ2014467	XZ2014467	China, Tibet, Linzhi District, Motuo County	95.1973	30.0588	Hypogymnia hypotrypa	KP178750	OL331874	OM103862	—	Trebouxia sp.5	OL331536	OL614562	OK668867
XZ2014472	XZ2014472	China, Tibet, Linzhi District, Motuo County	95.1973	30.0588	Hypogymnia hypotrypa	KP178749	OL331875	OM103873	—	Trebouxia sp.5	OL331540	—	OK668850
YN201408258	YN201408258	China, Yunnan Province, Lijiang County	100.176	26.9907	Hypogymnia hypotrypa	KP178762	OL331876	OM103878	—	Trebouxia sp.5	OL331533	—	—
YN201408266	YN201408266	China, Yunnan Province, Lijiang County	100.176	26.9907	Hypogymnia hypotrypa	KP178760	OL331877	OM103855	—	Trebouxia sp.5	OL331534	OL614561	OK668873
YN201408271	YN201408271	China, Yunnan Province, Lijiang County	100.176	26.9907	Hypogymnia hypotrypa	KP178761	OL331878	OM103854	—	Trebouxia sp.5	OL331535	—	OK668852
YN201408573	YN201408573	China, Yunnan Province, Lijiang County	99.094	28.344	Hypogymnia hypotrypa	KP178753	OL331879	OM103864	—	Trebouxia sp.5	OL331530	OL614555	OK668872
YN201408577	YN201408577	China, Yunnan Province, Lijiang County	99.094	28.344	Hypogymnia hypotrypa	KP178752	OL331880	OM103871	—	Trebouxia sp.5	OL331531	OL614560	OK668868
YT2017019	YT2017019	China, Fujian Province, Yongtai County	118.995	25.7786	Heterodermia japonica	OL331458	OL331881	OM103993	OM584317	Trebouxia sp.8	OL331697	OL614633	OK669023
YT2017026	YT2017026	China, Fujian Province, Yongtai County	118.995	25.7786	Heterodermia japonica	OL331463	OL331882	OM103990	OM584311	Trebouxia sp.8	OL331692	OL614630	OK669021
YT2017085	YT2017085	China, Fujian Province, Yongtai County	118.996	25.7681	Parmotrema clavuliferum	OL331350	OL331883	OM103900	OM688017	Trebouxia sp.10	OL331545	OL614602	OK668901
YT2017087	YT2017087	China, Fujian Province, Yongtai County	118.995	25.7786	Heterodermia japonica	OL331464	OL331884	OM103999	OM584320	Trebouxia sp.8	OL331693	OL614632	OK669017
YT2017107	YT2017107	China, Fujian Province, Yongtai County	118.996	25.765	Parmotrema clavuliferum	OL331351	OL331885	OM103901	OM688014	Trebouxia sp.10	OL331546	OL614603	—
YT2017207	YT2017207	China, Fujian Province, Yongtai County	119.004	25.7736	Parmotrema tinctorum	OL331345	OL331886	OM103910	OM688020	Trebouxia corticola	OL331583	OL614599	OK669032
YT2017208	YT2017208	China, Fujian Province, Yongtai County	119.004	25.7736	Parmotrema clavuliferum	OL331348	OL331887	OM103902	OM688012	Trebouxia sp.10	OL331547	OL614604	OK668899
YT2017209	YT2017209	China, Fujian Province, Yongtai County	119.004	25.7736	Parmotrema tinctorum	OL331347	OL331888	—	OM688022	Trebouxia corticola	OL331581	OL614608	OK668992
YT2017210	YT2017210	China, Fujian Province, Yongtai County	119.004	25.7736	Parmotrema clavuliferum	OL331349	OL331889	OM103903	OM688015	Trebouxia sp.10	OL331548	OL614605	OK668922
YT2017211	YT2017211	China, Fujian Province, Yongtai County	119.004	25.7736	Parmotrema tinctorum	OL331346	OL331890	OM103911	OM688023	Trebouxia corticola	OL331577	OL614607	OK668928
ZW11064	ZW11064	China, Ningxia Hui Hui Autonomous Region	105.392	37.0736	Squamarina kansuensis	OL331499	OL331891	—	—	Trebouxia cretacea	—	OL614510	—
ZW11077	ZW11077	China, Ningxia Hui Hui Autonomous Region	105.392	37.0736	Squamarina kansuensis	OL331500	OL331892	OM103925	—	Trebouxia cretacea	—	OL614511	—
