# Supplementary material for: Fungal-Algal Association Drives Lichen Mutualistic Symbiosis: A Case Study With Trebouxia-Related Lichens
Source: Preprints.org preprint supplement (doi:10.20944/preprints202305.1720.v1), 2023-05-25
Supplement: Supplementary file 1 [file supplementary › Supplementary Materials/Table S2.docx]

**Table S2. Molecular markers and primer sequences used in this study.**

| Marker | Primer | Sequence (5'→3') | Annealing temperature (℃) | Reference |
| --- | --- | --- | --- | --- |
| Mycobiont: |  |  |  |  |
| ITS | ITS4 | TCCTCCGCTTATTGATATGC | 55-60 | White et al. (1990) |
| ITS5 | GGAAGTAAAAGTCGTAACAAGG |
| LSU | LROR | ACCCGCTGAACTTAAGC | 55-60 | Vilgalys & Hester (1990) |
| LR5 | ATCCTGAGGGAAACTTC |
| nu-LSU-155-5 | GGGTCCGAGTTGTAATTTGT | Döring et al. (2000) |
| MtSSU | mrSSUl | AGCAGTGAGGAATATTGGTC' | 52 | Zoller et al. (1999) |
| mrSSU3R | ATGTGGCACGTCTATAGCCC |
| RPB1 | gRPB1-A | GA(G/T)TGTCC(T/G)GG(A/T)CATTTTGG | 56 | Stiller and Hall (1997) |
| fRPB-C | C(A/C/G/T)GC(A/T/G)AT(A/C/G/T)TC(A/G)TT(A/G)TCCAT(A/G)TA | Matheny et al. (2002) |
| RPB1-HETER-F | CGGACCCATATCAAGCTGTT | 55-50 (Touch down) | This study |
| RPB1-HETER-R | TGTCGCTACGTGAAATTGGA |
| RPB1-Rh-F | GCTTCATGACCAAAATCAAG |
| RPB1-Rh-R | GAAACTGCAGTAGTTGTTCG |
| Photobiont: |  |  |  |  |
| ITS | nr-SSU-1780-59 | CTGCGGAAGGATCATTGATTC | 50 | Piercey-Normore& DePriest (2001) |
| nr-LSU-0012-39 | AGTTCAGCGGGTGGTCTTG |
| AL1500bf | GATGCATTCAACGAGCCTA | 54 | Helms et al. (2001) |
| LR3 | ACCTGCGGAAGGATCATT | Friedl & Rokitta (1997) |
| rbcL | a-ch-rbcL-203 (f) | GAATCWTCWACWGGWACTTGGACWAC | 50 | Nelsen et al. (2011) |
| a-ch-rbcL-991(r) | CCTTCTARTTTACCWACAAC |
| PRASFll | ATGGTTCCACAAACAGAAAC | 47 | Nozaki et al. (1995) |
| PRASR2 | CAGTGAAACCACCAGTTAAATAG | Sherwood et al. (1990) |
| SSU | CV1 | TACCTGGTTGATCCTGCCAGTAG | 55 | Sawayama et al. (1995) |
| CV2 | CCAATCCCTAGTCGGCATCGT |
| a(treb)-nu-SSU-0078-5’-mpn | CATGTCTAAGTATAAACTGCT | 50 | Grande et al. (2014) |
| a(treb)-nu-SSU-0803-3’-mpn | TAGGCCAGAGTCCTATCGTGTTAT |
| Dip-18S-F | GTCAGAGGTGAAATTCTTGGATTTA | 55 | This study |
| Dip-18S-R | AAGGGCAGGGACGTAATCAACG |

**Reference：**

White, T. J., Bruns, T., Lee, S., & Taylor, J. (1990). Amplification and direct sequencing of fungal ribosomal RNA genes for phylogenetics. PCR protocols: a guide to methods and applications, 18(1), 315-322.

Vilgalys, R., & Hester, M. (1990). Rapid genetic identification and mapping of enzymatically amplified ribosomal DNA from several Cryptococcus species. *Journal of bacteriology, 172*(8), 4238-4246. <https://doi.org/10.1128/jb.172.8.4238-4246.1990>

Döring, H., Clerc, P., Grube, M., & Wedin, M. (2000). Mycobiont-specific PCR primers for the amplification of nuclear ITS and LSU rDNA from lichenized ascomycetes. *The Lichenologist, 32*(2), 200-204. <https://doi.org/10.1006/lich.1999.0250>.

Zoller, S., Scheidegger, C., & Sperisen, C. (1999). PCR primers for the amplification of mitochondrial small subunit ribosomal DNA of lichen-forming ascomycetes. *The Lichenologist, 31*(5), 511-516. <https://doi.org/10.1006/lich.1999.0220>.

Stiller, J. W., & Hall, B. D. (1997). The origin of red algae: implications for plastid evolution. *Proceedings of the National Academy of Sciences, 94*(9), 4520-4525. <https://doi.org/10.1073/pnas.94.9.4520>.

Matheny, P. B., Liu, Y. J., Ammirati, J. F., & Hall, B. D. (2002). Using RPB1 sequences to improve phylogenetic inference among mushrooms (Inocybe, Agaricales). *American journal of botany, 89*(4), 688-698. <https://doi.org/10.3732/ajb.89.4.688>.

Piercey‐Normore, M. D., & DePriest, P. T. (2001). Algal switching among lichen symbioses. *American journal of botany, 88*(8), 1490-1498. <https://doi.org/10.2307/3558457>.

Helms, G., Friedl, T., Rambold, G., & Mayrhofer, H. (2001). Identification of photobionts from the lichen family Physciaceae using algal-specific ITS rDNA sequencing. *The Lichenologist, 33*(1), 73-86. <https://doi.org/10.1006/lich.2000.0298>.

FRIEDL, T., & ROKITTA, C. (1997). Species relationships in the lichen alga Trebouxia (Chlorophyta, Trebouxiophyceae): molecular phylogenetic analyses of nuclear-encoded large subunit rRNA gene sequences. *Symbiosis*.

Nelsen, M. P., Plata, E. R., Andrew, C. J., Lücking, R., & Lumbsch, H. T. (2011). PHYLOGENETIC DIVERSITY OF TRENTEPOHLIALEAN ALGAE ASSOCIATED WITH LICHEN‐FORMING FUNGI 1. *Journal of Phycology, 47*(2), 282-290. <https://doi.org/10.1111/j.1529-8817.2011.00962.x>.

Nozaki, H., Itoh, M., Sano, R., Uchida, H., Watanabe, M. M., & Kuroiwa, T. (1995). Phylogenetic relationships within the colonial Volvocales (Chlorophyta) inferred from rbcL gene sequence data. *Journal of Phycology, 31*(6), 970-979. <https://doi.org/10.1111/j.0022-3646.1995.00970.x>.

Sherwood, A. R., Garbary, D. J., & Sheath, R. G. (2000). Assessing the phylogenetic position of the Prasiolales (Chlorophyta) using rbc L and 18S rRNA gene sequence data. *Phycologia, 39*(2), 139-146. <https://doi.org/10.2216/i0031-8884-39-2-139.1>.

Sawayama, S., Inoue, S., & Yokoyama, S. y. (1995). PHYLOGENETIC POSITION OF BOTRYOCOCCUS BRAUNII (CHLOROPHYCEAE) BASED ON SMALL SUBUNIT RIBOSOMAL RNA SEQUENCE DATA 1. *Journal of Phycology, 31*(3), 419-420. <https://doi.org/10.1111/j.0022-3646.1995.00419.x>.

Dal Grande, F., Beck, A., Cornejo, C., Singh, G., Cheenacharoen, S., Nelsen, M. P., & Scheidegger, C. (2014). Molecular phylogeny and symbiotic selectivity of the green algal genus Dictyochloropsis sl (Trebouxiophyceae): a polyphyletic and widespread group forming photobiont‐mediated guilds in the lichen family Lobariaceae. *New Phytologist, 202*(2), 455-470. <https://doi.org/10.1111/nph.12678>.
