# Supplementary material for: Fungal-Algal Association Drives Lichen Mutualistic Symbiosis: A Case Study With Trebouxia-Related Lichens
Source: Preprints.org preprint supplement (doi:10.20944/preprints202305.1720.v1), 2023-05-25
Supplement: Supplementary file 1 [file supplementary › Supplementary Materials/Table S3.xlsx]

## Sheet: Sheet1
Table S3. The climate type of lichen distributions.
Mycobiont	Photobiont	Specimens No.	Coll. No.	Locality	Climate type
Hypogymnia hypotrypa	Trebouxia sp.5	12100615	12100615	Japan	Temperate
Hypogymnia hypotrypa	Trebouxia sp.5	9091210	9091210	Japan	Temperate
Diplotomma alboatrum	Trebouxia arboricola	1-6-1	1-6-1	Sede Boger，Negav Desert，Station 1，Isreal	Tropical desert
Diplotomma alboatrum	Trebouxia arboricola	1-6-2	1-6-2	Sede Boger，Negav Desert，Station 1，Isreal	Tropical desert
Diplotomma alboatrum	Trebouxia sp.1	1-6-4	1-6-4	Sede Boger，Negav Desert，Station 1，Isreal	Tropical desert
Diplotomma alboatrum	Trebouxia arboricola	1-6-5	1-6-5	Sede Boger，Negav Desert，Station 1，Isreal	Tropical desert
Diplotomma alboatrum	Trebouxia arboricola	1-6-6	1-6-6	Sede Boger，Negav Desert，Station 1，Isreal	Tropical desert
Diplotomma alboatrum	Trebouxia sp.1	2-6-1	2-6-1	Sede Boger，Negav Desert，Station 2，Isreal	Tropical desert
Diplotomma alboatrum	Trebouxia arboricola	2-6-2	2-6-2	Sede Boger，Negav Desert，Station 2，Isreal	Tropical desert
Diplotomma alboatrum	Trebouxia arboricola	2-6-3	2-6-3	Sede Boger，Negav Desert，Station 2，Isreal	Tropical desert
Diplotomma alboatrum	Trebouxia arboricola	2-6-4	2-6-4	Sede Boger，Negav Desert，Station 2，Isreal	Tropical desert
Diplotomma alboatrum	Trebouxia sp.2	2-6-5	2-6-5	Sede Boger，Negav Desert，Station 2，Isreal	Tropical desert
Diplotomma alboatrum	Trebouxia arboricola	2-6-6	2-6-6	Sede Boger，Negav Desert，Station 2，Isreal	Tropical desert
Diplotomma alboatrum	Trebouxia sp.1	3-6-1	3-6-1	Sede Boger，Negav Desert，Station 3，Isreal	Tropical desert
Diplotomma alboatrum	Trebouxia arboricola	3-6-2	3-6-2	Sede Boger，Negav Desert，Station 3，Isreal	Tropical desert
Diplotomma alboatrum	Trebouxia arboricola	3-6-3	3-6-3	Sede Boger，Negav Desert，Station 3，Isreal	Tropical desert
Diplotomma alboatrum	Trebouxia arboricola	4-6-1	4-6-1	Sede Boger，Negav Desert，Station 4，Isreal	Tropical desert
Diplotomma alboatrum	Trebouxia arboricola	4-6-2	4-6-2	Sede Boger，Negav Desert，Station 4，Isreal	Tropical desert
Diplotomma alboatrum	Trebouxia sp.1	4-6-3	4-6-3	Sede Boger，Negav Desert，Station 4，Isreal	Tropical desert
Diplotomma alboatrum	Trebouxia arboricola	4-6-4	4-6-4	Sede Boger，Negav Desert，Station 4，Isreal	Tropical desert
Diplotomma alboatrum	Trebouxia arboricola	4-6-5	4-6-5	Sede Boger，Negav Desert，Station 4，Isreal	Tropical desert
Diplotomma alboatrum	Trebouxia arboricola	4-6-6	4-6-6	Sede Boger，Negav Desert，Station 4，Isreal	Tropical desert
Diplotomma alboatrum	Trebouxia arboricola	8-6-1	8-6-1	Sede Boger，Negav Desert，Station 8，Isreal	Tropical desert
Diplotomma alboatrum	Trebouxia arboricola	9-6-1	9-6-1	Sede Boger，Negav Desert，Station 9，Isreal	Tropical desert
Diplotomma alboatrum	Trebouxia arboricola	9-6-2	9-6-2	Sede Boger，Negav Desert，Station 9，Isreal	Tropical desert
Diplotomma alboatrum	Trebouxia sp.2	9-6-3	9-6-3	Sede Boger，Negav Desert，Station 9，Isreal	Tropical desert
Circinaria sp3.	Trebouxia cretacea	ALS1-3	ALS2018052	China, Inner Mongolia, Alxa Right Banner	Temperate
Acarospora strigata	Trebouxia cretacea	ALS1-6	ALS2018055	China, Inner Mongolia, Alxa Right Banner	Temperate
Circinaria tortuosa	Trebouxia cretacea	ALS1-7	ALS2018056	China, Inner Mongolia, Alxa Right Banner	Temperate
Acarospora strigata	Trebouxia cretacea	ALS1-8	ALS2018057	China, Inner Mongolia, Alxa Right Banner	Temperate
Circinaria tortuosa	Trebouxia sp.3	ALS2-4	ALS2018061	China, Inner Mongolia, Alxa Right Banner	Temperate
Circinaria sp2.	Trebouxia cretacea	ALS2-6	ALS2018063	China, Inner Mongolia, Alxa Right Banner	Temperate
Circinaria tortuosa	Trebouxia sp.3	ALS3-1	ALS2018069	China, Inner Mongolia, Alxa Right Banner	Temperate
Circinaria tortuosa	Trebouxia cretacea	ALS3-2	ALS2018070	China, Inner Mongolia, Alxa Right Banner	Temperate
Candelariella sp.	Trebouxia cretacea	ALS3-4	ALS2018072	China, Inner Mongolia, Alxa Right Banner	Temperate
Circinaria tortuosa	Trebouxia sp.3	ALS3-6	ALS2018074	China, Inner Mongolia, Alxa Right Banner	Temperate
Lobothallia semisterilis	Trebouxia cretacea	ALS3-7	ALS2018075	China, Inner Mongolia, Alxa Right Banner	Temperate
Lobothallia semisterilis	Trebouxia sp.3	ALS4-1	ALS2018076	China, Inner Mongolia, Alxa Right Banner	Temperate
Lobothallia semisterilis	Trebouxia sp.3	ALS4-4	ALS2018079	China, Inner Mongolia, Alxa Right Banner	Temperate
Caloplaca sp.	Trebouxia cretacea	ALS5-1	ALS2018086	China, Inner Mongolia, Alxa Right Banner	Temperate
Acarospora nodulosa	Trebouxia cretacea	ALS5-12	ALS2018097	China, Inner Mongolia, Alxa Right Banner	Temperate
Lobothallia semisterilis	Trebouxia sp.3	ALS5-13	ALS2018098	China, Inner Mongolia, Alxa Right Banner	Temperate
Caloplaca sp.	Trebouxia cretacea	ALS5-2	ALS2018087	China, Inner Mongolia, Alxa Right Banner	Temperate
Lobothallia semisterilis	Trebouxia sp.3	ALS5-21	ALS2018106	China, Inner Mongolia, Alxa Right Banner	Temperate
Acarospora nodulosa	Trebouxia cretacea	ALS5-4	ALS2018089	China, Inner Mongolia, Alxa Right Banner	Temperate
Lobothallia semisterilis	Trebouxia sp.3	ALS5-5	ALS2018090	China, Inner Mongolia, Alxa Right Banner	Temperate
Lobothallia semisterilis	Trebouxia sp.3	ALS5-7	ALS2018092	China, Inner Mongolia, Alxa Right Banner	Temperate
Hypogymnia hypotrypa	Trebouxia sp.5	ML12014	ML12014	China,Yunnan Province, Deqin County	Temperate
Psoroma fruticulosum	Trebouxia sp.6	NJ2018027	NJ2018027	China, Antarctic Great Wall Station	Boreal, arctic
Ochrolechia tartarea	Trebouxia impressa	NJ2018029	NJ2018029	China, Antarctic Great Wall Station	Boreal, arctic
Hypogymnia antarctica	Trebouxia jamesii	NJ2018030	NJ2018030	China, Antarctic Great Wall Station	Boreal, arctic
Umbilicaria antarctica	Trebouxia jamesii	NJ2018031	NJ2018031	China, Antarctic Great Wall Station	Boreal, arctic
Physcia caesia	Trebouxia impressa	NJ2018032	NJ2018032	China, Antarctic Great Wall Station	Boreal, arctic
Physcia dubia	Trebouxia impressa	NJ2018033	NJ2018033	China, Antarctic Great Wall Station	Boreal, arctic
Gondwania regalis	Trebouxia arboricola	NJ2018034	NJ2018034	China, Antarctic Great Wall Station	Boreal, arctic
Gondwania regalis	Trebouxia arboricola	NJ2018035	NJ2018035	China, Antarctic Great Wall Station	Boreal, arctic
Tephromela atra	Trebouxia jamesii	NJ2018036	NJ2018036	China, Antarctic Great Wall Station	Boreal, arctic
Himantormia lugubris	Trebouxia jamesii	NJ2018037	NJ2018037	China, Antarctic Great Wall Station	Boreal, arctic
Ramalina terebrata	Trebouxia arboricola	NJ2018038	NJ2018038	China, Antarctic Great Wall Station	Boreal, arctic
Usnea aurantiacoatra	Trebouxia jamesii	NJ2018039	NJ2018039	China, Antarctic Great Wall Station	Boreal, arctic
Ramalina terebrata	Trebouxia arboricola	NJ2018040	NJ2018040	China, Antarctic Great Wall Station	Boreal, arctic
Bryoplaca tetraspora	Trebouxia impressa	NJ2018041	NJ2018041	China, Antarctic Great Wall Station	Boreal, arctic
Psoroma cinnamomeum	Trebouxia cretacea	NJ2018042	NJ2018042	China, Antarctic Great Wall Station	Boreal, arctic
Himantormia lugubris	Trebouxia jamesii	NJ2018044	NJ2018044	China, Antarctic Great Wall Station	Boreal, arctic
Himantormia lugubris	Trebouxia jamesii	NJ2018046	NJ2018046	China, Antarctic Great Wall Station	Boreal, arctic
Usnea aurantiacoatra	Trebouxia jamesii	NJ2018048	NJ2018048	China, Antarctic Great Wall Station	Boreal, arctic
Parmelia saxatilis	Trebouxia jamesii	NJ2018050	NJ2018050	China, Antarctic Great Wall Station	Boreal, arctic
Bryoplaca tetraspora	Trebouxia impressa	NJ2018052	NJ2018052	China, Antarctic Great Wall Station	Boreal, arctic
Usnea aurantiacoatra	Trebouxia jamesii	NJ2018053	NJ2018053	China, Antarctic Great Wall Station	Boreal, arctic
Ramalina terebrata	Trebouxia arboricola	NJ2018054	NJ2018054	China, Antarctic Great Wall Station	Boreal, arctic
Usnea aurantiacoatra	Trebouxia jamesii	NJ2018055	NJ2018055	China, Antarctic Great Wall Station	Boreal, arctic
Bryoplaca tetraspora	Trebouxia impressa	NJ2018056	NJ2018056	China, Antarctic Great Wall Station	Boreal, arctic
Usnea aurantiacoatra	Trebouxia jamesii	NJ2018057	NJ2018057	China, Antarctic Great Wall Station	Boreal, arctic
Parmelia saxatilis	Trebouxia jamesii	NJ2018058	NJ2018058	China, Antarctic Great Wall Station	Boreal, arctic
Ochrolechia tartarea	Trebouxia jamesii	NJ2018061	NJ2018061	China, Antarctic Great Wall Station	Boreal, arctic
Usnea aurantiacoatra	Trebouxia jamesii	NJ2018062	NJ2018062	China, Antarctic Great Wall Station	Boreal, arctic
Usnea aurantiacoatra	Trebouxia jamesii	NJ2018063	NJ2018063	China, Antarctic Great Wall Station	Boreal, arctic
Parmelia saxatilis	Trebouxia jamesii	NJ2018071	NJ2018071	China, Antarctic Great Wall Station	Boreal, arctic
Parmelia saxatilis	Trebouxia jamesii	NJ2018072	NJ2018072	China, Antarctic Great Wall Station	Boreal, arctic
Bryoria fuscescens	Trebouxia jamesii	NJ2018073	NJ2018073	China, Antarctic Great Wall Station	Boreal, arctic
Megaspora verrucosa	Trebouxia impressa	NJ2018074	NJ2018074	China, Antarctic Great Wall Station	Boreal, arctic
Gondwania sublobulata	Trebouxia arboricola	NJ2018075	NJ2018075	China, Antarctic Great Wall Station	Boreal, arctic
Gondwania sublobulata	Trebouxia arboricola	NJ2018076	NJ2018076	China, Antarctic Great Wall Station	Boreal, arctic
Usnea aurantiacoatra	Trebouxia jamesii	NJ2018077	NJ2018077	China, Antarctic Great Wall Station	Boreal, arctic
Lecanora fuscobrunnea	Trebouxia impressa	NJ2018078	NJ2018078	China, Antarctic Great Wall Station	Boreal, arctic
Gondwania regalis	Trebouxia impressa	NJ2018079	NJ2018079	China, Antarctic Great Wall Station	Boreal, arctic
Ramalina terebrata	Trebouxia arboricola	NJ2018080	NJ2018080	China, Antarctic Great Wall Station	Boreal, arctic
Rhizoplaca chrysoleuca clade B	Trebouxia impressa	NMG20151298	NMG20151298	China, Inner Mongolia, Chifeng City	Temperate
Rhizoplaca chrysoleuca clade F	Trebouxia impressa	NMG20151339	NMG20151339	China, Inner Mongolia, Chifeng City	Temperate
Rhizoplaca chrysoleuca clade F	Trebouxia impressa	NMG20151402	NMG20151402	China, Inner Mongolia, Chifeng City	Temperate
Rhizoplaca chrysoleuca clade F	Trebouxia impressa	NMG2015408	NMG2015408	China, Inner Mongolia, Ergun City	Temperate
Rhizoplaca chrysoleuca clade F	Trebouxia sp.7	QH12038	QH12038	China, Qinghai Province	alpine/Temperate
Rhizoplaca chrysoleuca clade F	Trebouxia impressa	QH12098	QH12098	China, Qinghai Province	alpine/Temperate
Rhizoplaca chrysoleuca clade F	Trebouxia impressa	QH121170	QH121170	China, Qinghai Province	alpine/Temperate
Rhizoplaca chrysoleuca clade F	Trebouxia impressa	QH12163	QH12163	China, Qinghai Province	alpine/Temperate
Rhizoplaca chrysoleuca clade F	Trebouxia impressa	QH12191	QH12191	China, Qinghai Province	alpine/Temperate
Rhizoplaca chrysoleuca clade F	Trebouxia impressa	QH12203	QH12203	China, Qinghai Province	alpine/Temperate
Rhizoplaca chrysoleuca clade F	Trebouxia sp.7	QH12636	QH12636	China, Qinghai Province	alpine/Temperate
Rhizoplaca chrysoleuca clade F	Trebouxia sp.7	QH12638	QH12638	China, Qinghai Province	alpine/Temperate
Rhizoplaca chrysoleuca clade F	Trebouxia sp.7	QH12640	QH12640	China, Qinghai Province	alpine/Temperate
Heterodermia japonica	Trebouxia sp.8	QJ2-1	QJ2018001	China, Yunnan Province, Qujing County	Subtropical
Parmotrema clavuliferum	Trebouxia sp.10	QJ2-10	QJ2018010	China, Yunnan Province, Qujing County	Subtropical
Usnea dasaea	Trebouxia sp.10	QJ2-11	QJ2018011	China, Yunnan Province, Qujing County	Subtropical
Heterodermia japonica	Trebouxia sp.8	QJ2-2	QJ2018002	China, Yunnan Province, Qujing County	Subtropical
Hypotrachyna osseoalba	Trebouxia sp.10	QJ2-3	QJ2018003	China, Yunnan Province, Qujing County	Subtropical
Usnea dasaea	Trebouxia sp.10	QJ2-4	QJ2018004	China, Yunnan Province, Qujing County	Subtropical
Parmotrema clavuliferum	Trebouxia sp.10	QJ2-5	QJ2018005	China, Yunnan Province, Qujing County	Subtropical
Parmotrema clavuliferum	Trebouxia sp.10	QJ2-6	QJ2018006	China, Yunnan Province, Qujing County	Subtropical
Usnea dasaea	Trebouxia sp.10	QJ2-7	QJ2018007	China, Yunnan Province, Qujing County	Subtropical
Heterodermia japonica	Trebouxia sp.8	QJ2-8	QJ2018008	China, Yunnan Province, Qujing County	Subtropical
Parmotrema clavuliferum	Trebouxia sp.10	QJ2-9	QJ2018009	China, Yunnan Province, Qujing County	Subtropical
Punctelia rudecta	Trebouxia anticipata	QJ3-1	QJ2018013	China, Yunnan Province, Qujing County	Subtropical
Ramalina calicaris	Trebouxia sp.9	QJ3-2	QJ2018014	China, Yunnan Province, Qujing County	Subtropical
Flavoparmelia caperata	Trebouxia anticipata	QJ3-3	QJ2018015	China, Yunnan Province, Qujing County	Subtropical
Heterodermia speciosa	Trebouxia sp.8	QJ3-4	QJ2018016	China, Yunnan Province, Qujing County	Subtropical
Punctelia rudecta	Trebouxia anticipata	QJ3-7	QJ2018019	China, Yunnan Province, Qujing County	Subtropical
Parmotrema clavuliferum	Trebouxia sp.10	QJ3-9	QJ2018021	China, Yunnan Province, Qujing County	Subtropical
Usnea dasaea	Trebouxia sp.10	QJ4-1	QJ2018023	China, Yunnan Province, Qujing County	Subtropical
Parmotrema clavuliferum	Trebouxia sp.10	QJ4-10	QJ2018032	China, Yunnan Province, Qujing County	Subtropical
Heterodermia japonica	Trebouxia sp.8	QJ4-11	QJ2018033	China, Yunnan Province, Qujing County	Subtropical
Hypotrachyna osseoalba	Trebouxia sp.10	QJ4-12	QJ2018034	China, Yunnan Province, Qujing County	Subtropical
Parmotrema clavuliferum	Trebouxia sp.10	QJ4-2	QJ2018024	China, Yunnan Province, Qujing County	Subtropical
Menegazzia subsimilis	Trebouxia sp.4	QJ4-3	QJ2018025	China, Yunnan Province, Qujing County	Subtropical
Parmotrema clavuliferum	Trebouxia sp.10	QJ4-4	QJ2018026	China, Yunnan Province, Qujing County	Subtropical
Hypotrachyna osseoalba	Trebouxia sp.10	QJ4-5	QJ2018027	China, Yunnan Province, Qujing County	Subtropical
Menegazzia subsimilis	Trebouxia sp.4	QJ4-6	QJ2018028	China, Yunnan Province, Qujing County	Subtropical
Parmotrema clavuliferum	Trebouxia sp.9	QJ4-7	QJ2018029	China, Yunnan Province, Qujing County	Subtropical
Flavoparmelia caperata	Trebouxia anticipata	QJ4-8	QJ2018030	China, Yunnan Province, Qujing County	Subtropical
Usnea dasaea	Trebouxia sp.10	QJ4-9	QJ2018031	China, Yunnan Province, Qujing County	Subtropical
Hypotrachyna osseoalba	Trebouxia sp.10	QJ5-1	QJ2018036	China, Yunnan Province, Qujing County	Subtropical
Parmotrema clavuliferum	Trebouxia sp.10	QJ5-10	QJ2018045	China, Yunnan Province, Qujing County	Subtropical
Usnea dasaea	Trebouxia sp.10	QJ5-2	QJ2018037	China, Yunnan Province, Qujing County	Subtropical
Parmotrema clavuliferum	Trebouxia sp.10	QJ5-3	QJ2018038	China, Yunnan Province, Qujing County	Subtropical
Hypotrachyna osseoalba	Trebouxia sp.10	QJ5-4	QJ2018039	China, Yunnan Province, Qujing County	Subtropical
Ramalina calicaris	Trebouxia sp.10	QJ5-5	QJ2018040	China, Yunnan Province, Qujing County	Subtropical
Parmotrema clavuliferum	Trebouxia sp.10	QJ5-6	QJ2018041	China, Yunnan Province, Qujing County	Subtropical
Hypotrachyna osseoalba	Trebouxia sp.10	QJ5-7	QJ2018042	China, Yunnan Province, Qujing County	Subtropical
Usnea dasaea	Trebouxia sp.10	QJ5-8	QJ2018043	China, Yunnan Province, Qujing County	Subtropical
Hypotrachyna osseoalba	Trebouxia sp.10	QJ5-9	QJ2018044	China, Yunnan Province, Qujing County	Subtropical
Rhizoplaca chrysoleuca clade F	Trebouxia sp.7	SC201408738	SC201408738	China, Sichuan Province, Daocheng County	alpine/Temperate
Rhizoplaca chrysoleuca clade F	Trebouxia sp.7	SC201408768	SC201408768	China, Sichuan Province, Daocheng County	alpine/Temperate
Rhizoplaca chrysoleuca clade F	Trebouxia sp.7	SC201408782	SC201408782	China, Sichuan Province, Daocheng County	alpine/Temperate
Hypogymnia hypotrypa	Trebouxia sp.5	SC201408833	SC201408833	China, Sichuan Province, Yajiang County	alpine
Hypogymnia hypotrypa	Trebouxia sp.5	SC201408834	SC201408834	China, Sichuan Province, Yajiang County	alpine
Hypogymnia hypotrypa	Trebouxia sp.5	SC201408835	SC201408835	China, Sichuan Province, Yajiang County	alpine
Diplotomma alboatrum	Trebouxia cretacea	SPT11013	SPT11013	China, Ningxia Hui Hui Autonomous Region	Temperate
Diplotomma alboatrum	Trebouxia cretacea	SPT11015	SPT11015	China, Ningxia Hui Hui Autonomous Region	Temperate
Squamarina kansuensis	Trebouxia cretacea	SPT1251	SPT1251	China, Ningxia Hui Hui Autonomous Region	Temperate
Hypogymnia hypotrypa	Trebouxia sp.5	SXM1	SXM1	China, Shaanxi Province, Mt.Taibai	Temperate
Hypogymnia hypotrypa	Trebouxia sp.5	SXM2	SXM2	China, Shaanxi Province, Mt.Taibai	Temperate
Hypogymnia hypotrypa	Trebouxia sp.5	SXM3	SXM3	China, Shaanxi Province, Mt.Taibai	Temperate
Hypogymnia hypotrypa	Trebouxia sp.5	T2	T2	China, Taiwan Province, Nantou County	Subtropical
Hypogymnia hypotrypa	Trebouxia sp.5	T3	T3	China, Taiwan Province, Nantou County	Subtropical
Hypogymnia hypotrypa	Trebouxia sp.5	TI	TI	China, Taiwan Province, Nantou County	Subtropical
Parmotrema tinctorum	Trebouxia corticola	WYS2017162	WYS2017162	China, Fujian Province, Mt. Wuyi	Subtropical
Parmotrema tinctorum	Trebouxia corticola	WYS2017163	WYS2017163	China, Fujian Province, Mt. Wuyi	Subtropical
Parmotrema tinctorum	Trebouxia corticola	WYS2017164	WYS2017164	China, Fujian Province, Mt. Wuyi	Subtropical
Heterodermia japonica	Trebouxia sp.8	XA2017017	XA2017017	China, Guangxi Province, Mt. Mao'er	Subtropical
Heterodermia japonica	Trebouxia sp.8	XA2017038	XA2017038	China, Guangxi Province, Mt. Mao'er	Subtropical
Heterodermia japonica	Trebouxia sp.8	XA2017052	XA2017052	China, Guangxi Province, Mt. Mao'er	Subtropical
Heterodermia japonica	Trebouxia sp.8	XA2017053	XA2017053	China, Guangxi Province, Mt. Mao'er	Subtropical
Heterodermia japonica	Trebouxia sp.8	XA2017054	XA2017054	China, Guangxi Province, Mt. Mao'er	Subtropical
Heterodermia japonica	Trebouxia sp.8	XA2017058	XA2017058	China, Guangxi Province, Mt. Mao'er	Subtropical
Heterodermia japonica	Trebouxia sp.8	XA2017059	XA2017059	China, Guangxi Province, Mt. Mao'er	Subtropical
Parmotrema tinctorum	Trebouxia corticola	XTM2017001	XTM2017001	China, Zhejiang Province, Mt. Tianmu	Subtropical
Parmotrema tinctorum	Trebouxia corticola	XTM2017002	XTM2017002	China, Zhejiang Province, Mt. Tianmu	Subtropical
Parmotrema tinctorum	Trebouxia corticola	XTM2017003	XTM2017003	China, Zhejiang Province, Mt. Tianmu	Subtropical
Heterodermia japonica	Trebouxia sp.8	XTM2017084	XTM2017084	China, Zhejiang Province, Mt. Tianmu	Subtropical
Heterodermia japonica	Trebouxia sp.8	XTM2017089	XTM2017089	China, Zhejiang Province, Mt. Tianmu	Subtropical
Heterodermia japonica	Trebouxia sp.8	XTM2017106	XTM2017106	China, Zhejiang Province, Mt. Tianmu	Subtropical
Heterodermia japonica	Trebouxia sp.8	XTM2017108	XTM2017108	China, Zhejiang Province, Mt. Tianmu	Subtropical
Heterodermia japonica	Trebouxia sp.8	XTM2017109	XTM2017109	China, Zhejiang Province, Mt. Tianmu	Subtropical
Heterodermia japonica	Trebouxia sp.8	XTM2017110	XTM2017110	China, Zhejiang Province, Mt. Tianmu	Subtropical
Heterodermia japonica	Trebouxia sp.8	XTM2017112	XTM2017112	China, Zhejiang Province, Mt. Tianmu	Subtropical
Hypogymnia hypotrypa	Trebouxia sp.5	XZ20140101	XZ20140101	China, Tibet, Linzhi District, Milin County	alpine/Temperate
Hypogymnia hypotrypa	Trebouxia sp.5	XZ20140833	XZ20140833	China, Tibet, Linzhi District, Milin County	alpine/Temperate
Hypogymnia hypotrypa	Trebouxia sp.5	XZ20140834	XZ20140834	China, Tibet, Linzhi District, Milin County	alpine/Temperate
Hypogymnia hypotrypa	Trebouxia sp.5	XZ2014235	XZ2014235	China, Tibet, Linzhi District, Milin County	alpine/Temperate
Hypogymnia hypotrypa	Trebouxia sp.5	XZ2014237	XZ2014237	China, Tibet, Linzhi District, Milin County	alpine/Temperate
Hypogymnia hypotrypa	Trebouxia sp.5	XZ2014244	XZ2014244	China, Tibet, Linzhi District, Milin County	alpine/Temperate
Hypogymnia hypotrypa	Trebouxia sp.5	XZ2014452	XZ2014452	China, Tibet, Linzhi District, Motuo County	Subtropical
Hypogymnia hypotrypa	Trebouxia sp.5	XZ2014467	XZ2014467	China, Tibet, Linzhi District, Motuo County	Subtropical
Hypogymnia hypotrypa	Trebouxia sp.5	XZ2014472	XZ2014472	China, Tibet, Linzhi District, Motuo County	Subtropical
Hypogymnia hypotrypa	Trebouxia sp.5	YN201408258	YN201408258	China, Yunnan Province, Lijiang County	Subtropical
Hypogymnia hypotrypa	Trebouxia sp.5	YN201408266	YN201408266	China, Yunnan Province, Lijiang County	Subtropical
Hypogymnia hypotrypa	Trebouxia sp.5	YN201408271	YN201408271	China, Yunnan Province, Lijiang County	Subtropical
Hypogymnia hypotrypa	Trebouxia sp.5	YN201408573	YN201408573	China,Yunnan Province, Deqin County	Temperate
Hypogymnia hypotrypa	Trebouxia sp.5	YN201408577	YN201408577	China,Yunnan Province, Deqin County	Temperate
Heterodermia japonica	Trebouxia sp.8	YT2017019	YT2017019	China, Fujian Province, Yongtai County	Subtropical
Heterodermia japonica	Trebouxia sp.8	YT2017026	YT2017026	China, Fujian Province, Yongtai County	Subtropical
Parmotrema clavuliferum	Trebouxia sp.10	YT2017085	YT2017085	China, Fujian Province, Yongtai County	Subtropical
Heterodermia japonica	Trebouxia sp.8	YT2017087	YT2017087	China, Fujian Province, Yongtai County	Subtropical
Parmotrema clavuliferum	Trebouxia sp.10	YT2017107	YT2017107	China, Fujian Province, Yongtai County	Subtropical
Parmotrema tinctorum	Trebouxia corticola	YT2017207	YT2017207	China, Fujian Province, Yongtai County	Subtropical
Parmotrema clavuliferum	Trebouxia sp.10	YT2017208	YT2017208	China, Fujian Province, Yongtai County	Subtropical
Parmotrema tinctorum	Trebouxia corticola	YT2017209	YT2017209	China, Fujian Province, Yongtai County	Subtropical
Parmotrema clavuliferum	Trebouxia sp.10	YT2017210	YT2017210	China, Fujian Province, Yongtai County	Subtropical
Parmotrema tinctorum	Trebouxia corticola	YT2017211	YT2017211	China, Fujian Province, Yongtai County	Subtropical
Squamarina kansuensis	Trebouxia cretacea	ZW11064	ZW11064	China, Ningxia Hui Hui Autonomous Region	Temperate
Squamarina kansuensis	Trebouxia cretacea	ZW11077	ZW11077	China, Ningxia Hui Hui Autonomous Region	Temperate
